# Supplementary material for: The rapid profiling and simultaneous determination of 12 major alkaloids in Nauclea officinalis by UPLC-Q-TOF-MS and HPLC-ESI-MS/MS
Source: Royal Society of Chemistry journal article supplement (doi:10.1039/d1ay01571k), 2021-01-01
Supplement: d1ay01571k1.pdf [file d1ay01571k1.pdf]

**Table.S1 The post hoc comparison results of pumiloside among ten batch *N.officinalis* herbs**

|                  | (I) Batch | (J) batch   | Mean Difference<br>(I-J) | Standard<br>Error | Significance | 95% confidence interval |             |
|------------------|-----------|-------------|--------------------------|-------------------|--------------|-------------------------|-------------|
|                  |           |             |                          |                   |              | Lower limit             | Upper limit |
| <b>Tukey HSD</b> | 161212    | 161220      | -40.57900*               | 2.27974           | .000         | -48.6518                | -32.5062    |
|                  |           | 160914      | -108.99567*              | 2.27974           | .000         | -117.0685               | -100.9229   |
|                  |           | 170911      | -242.03233*              | 2.27974           | .000         | -250.1051               | -233.9595   |
|                  |           | 180321      | -155.71900*              | 2.27974           | .000         | -163.7918               | -147.6462   |
|                  |           | 190330      | -283.00567*              | 2.27974           | .000         | -291.0785               | -274.9329   |
|                  |           | 200422      | -93.05233*               | 2.27974           | .000         | -101.1251               | -84.9795    |
|                  |           | 200428      | -143.69900*              | 2.27974           | .000         | -151.7718               | -135.6262   |
|                  |           | 200518      | -167.49900*              | 2.27974           | .000         | -175.5718               | -159.4262   |
|                  |           | 200602      | -258.52567*              | 2.27974           | .000         | -266.5985               | -250.4529   |
|                  | 161220    | 161212      | 40.57900*                | 2.27974           | .000         | 32.5062                 | 48.6518     |
|                  |           | 160914      | -68.41667*               | 2.27974           | .000         | -76.4895                | -60.3439    |
|                  |           | 170911      | -201.45333*              | 2.27974           | .000         | -209.5261               | -193.3805   |
|                  |           | 180321      | -115.14000*              | 2.27974           | .000         | -123.2128               | -107.0672   |
|                  |           | 190330      | -242.42667*              | 2.27974           | .000         | -250.4995               | -234.3539   |
|                  |           | 200422      | -52.47333*               | 2.27974           | .000         | -60.5461                | -44.4005    |
|                  |           | 200428      | -103.12000*              | 2.27974           | .000         | -111.1928               | -95.0472    |
|                  |           | 200518      | -126.92000*              | 2.27974           | .000         | -134.9928               | -118.8472   |
|                  |           | 200602      | -217.94667*              | 2.27974           | .000         | -226.0195               | -209.8739   |
| 160914           | 161212    | 108.99567*  | 2.27974                  | .000              | 100.9229     | 117.0685                |             |
|                  | 161220    | 68.41667*   | 2.27974                  | .000              | 60.3439      | 76.4895                 |             |
|                  | 170911    | -133.03667* | 2.27974                  | .000              | -141.1095    | -124.9639               |             |
|                  | 180321    | -46.72333*  | 2.27974                  | .000              | -54.7961     | -38.6505                |             |
|                  | 190330    | -174.01000* | 2.27974                  | .000              | -182.0828    | -165.9372               |             |
|                  | 200422    | 15.94333*   | 2.27974                  | .000              | 7.8705       | 24.0161                 |             |
|                  | 200428    | -34.70333*  | 2.27974                  | .000              | -42.7761     | -26.6305                |             |
|                  | 200518    | -58.50333*  | 2.27974                  | .000              | -66.5761     | -50.4305                |             |
|                  | 200602    | -149.53000* | 2.27974                  | .000              | -157.6028    | -141.4572               |             |
| 170911           | 161212    | 242.03233*  | 2.27974                  | .000              | 233.9595     | 250.1051                |             |
|                  | 161220    | 201.45333*  | 2.27974                  | .000              | 193.3805     | 209.5261                |             |
|                  | 160914    | 133.03667*  | 2.27974                  | .000              | 124.9639     | 141.1095                |             |
|                  | 180321    | 86.31333*   | 2.27974                  | .000              | 78.2405      | 94.3861                 |             |
|                  | 190330    | -40.97333*  | 2.27974                  | .000              | -49.0461     | -32.9005                |             |
|                  | 200422    | 148.98000*  | 2.27974                  | .000              | 140.9072     | 157.0528                |             |
|                  | 200428    | 98.33333*   | 2.27974                  | .000              | 90.2605      | 106.4061                |             |
|                  | 200518    | 74.53333*   | 2.27974                  | .000              | 66.4605      | 82.6061                 |             |
|                  | 200602    | -16.49333*  | 2.27974                  | .000              | -24.5661     | -8.4205                 |             |
| 180321           | 161212    | 155.71900*  | 2.27974                  | .000              | 147.6462     | 163.7918                |             |
|                  | 161220    | 115.14000*  | 2.27974                  | .000              | 107.0672     | 123.2128                |             |
|                  | 160914    | 46.72333*   | 2.27974                  | .000              | 38.6505      | 54.7961                 |             |

|        |        |             |         |      |           |           |
|--------|--------|-------------|---------|------|-----------|-----------|
|        | 170911 | -86.31333*  | 2.27974 | .000 | -94.3861  | -78.2405  |
|        | 190330 | -127.28667* | 2.27974 | .000 | -135.3595 | -119.2139 |
|        | 200422 | 62.66667*   | 2.27974 | .000 | 54.5939   | 70.7395   |
|        | 200428 | 12.02000*   | 2.27974 | .001 | 3.9472    | 20.0928   |
|        | 200518 | -11.78000*  | 2.27974 | .002 | -19.8528  | -3.7072   |
|        | 200602 | -102.80667* | 2.27974 | .000 | -110.8795 | -94.7339  |
| 190330 | 161212 | 283.00567*  | 2.27974 | .000 | 274.9329  | 291.0785  |
|        | 161220 | 242.42667*  | 2.27974 | .000 | 234.3539  | 250.4995  |
|        | 160914 | 174.01000*  | 2.27974 | .000 | 165.9372  | 182.0828  |
|        | 170911 | 40.97333*   | 2.27974 | .000 | 32.9005   | 49.0461   |
|        | 180321 | 127.28667*  | 2.27974 | .000 | 119.2139  | 135.3595  |
|        | 200422 | 189.95333*  | 2.27974 | .000 | 181.8805  | 198.0261  |
|        | 200428 | 139.30667*  | 2.27974 | .000 | 131.2339  | 147.3795  |
|        | 200518 | 115.50667*  | 2.27974 | .000 | 107.4339  | 123.5795  |
|        | 200602 | 24.48000*   | 2.27974 | .000 | 16.4072   | 32.5528   |
| 200422 | 161212 | 93.05233*   | 2.27974 | .000 | 84.9795   | 101.1251  |
|        | 161220 | 52.47333*   | 2.27974 | .000 | 44.4005   | 60.5461   |
|        | 160914 | -15.94333*  | 2.27974 | .000 | -24.0161  | -7.8705   |
|        | 170911 | -148.98000* | 2.27974 | .000 | -157.0528 | -140.9072 |
|        | 180321 | -62.66667*  | 2.27974 | .000 | -70.7395  | -54.5939  |
|        | 190330 | -189.95333* | 2.27974 | .000 | -198.0261 | -181.8805 |
|        | 200428 | -50.64667*  | 2.27974 | .000 | -58.7195  | -42.5739  |
|        | 200518 | -74.44667*  | 2.27974 | .000 | -82.5195  | -66.3739  |
|        | 200602 | -165.47333* | 2.27974 | .000 | -173.5461 | -157.4005 |
| 200428 | 161212 | 143.69900*  | 2.27974 | .000 | 135.6262  | 151.7718  |
|        | 161220 | 103.12000*  | 2.27974 | .000 | 95.0472   | 111.1928  |
|        | 160914 | 34.70333*   | 2.27974 | .000 | 26.6305   | 42.7761   |
|        | 170911 | -98.33333*  | 2.27974 | .000 | -106.4061 | -90.2605  |
|        | 180321 | -12.02000*  | 2.27974 | .001 | -20.0928  | -3.9472   |
|        | 190330 | -139.30667* | 2.27974 | .000 | -147.3795 | -131.2339 |
|        | 200422 | 50.64667*   | 2.27974 | .000 | 42.5739   | 58.7195   |
|        | 200518 | -23.80000*  | 2.27974 | .000 | -31.8728  | -15.7272  |
|        | 200602 | -114.82667* | 2.27974 | .000 | -122.8995 | -106.7539 |
| 200518 | 161212 | 167.49900*  | 2.27974 | .000 | 159.4262  | 175.5718  |
|        | 161220 | 126.92000*  | 2.27974 | .000 | 118.8472  | 134.9928  |
|        | 160914 | 58.50333*   | 2.27974 | .000 | 50.4305   | 66.5761   |
|        | 170911 | -74.53333*  | 2.27974 | .000 | -82.6061  | -66.4605  |
|        | 180321 | 11.78000*   | 2.27974 | .002 | 3.7072    | 19.8528   |
|        | 190330 | -115.50667* | 2.27974 | .000 | -123.5795 | -107.4339 |
|        | 200422 | 74.44667*   | 2.27974 | .000 | 66.3739   | 82.5195   |
|        | 200428 | 23.80000*   | 2.27974 | .000 | 15.7272   | 31.8728   |
|        | 200602 | -91.02667*  | 2.27974 | .000 | -99.0995  | -82.9539  |
| 200602 | 161212 | 258.52567*  | 2.27974 | .000 | 250.4529  | 266.5985  |

|        |            |         |      |          |          |
|--------|------------|---------|------|----------|----------|
| 161220 | 217.94667* | 2.27974 | .000 | 209.8739 | 226.0195 |
| 160914 | 149.53000* | 2.27974 | .000 | 141.4572 | 157.6028 |
| 170911 | 16.49333*  | 2.27974 | .000 | 8.4205   | 24.5661  |
| 180321 | 102.80667* | 2.27974 | .000 | 94.7339  | 110.8795 |
| 190330 | -24.48000* | 2.27974 | .000 | -32.5528 | -16.4072 |
| 200422 | 165.47333* | 2.27974 | .000 | 157.4005 | 173.5461 |
| 200428 | 114.82667* | 2.27974 | .000 | 106.7539 | 122.8995 |
| 200518 | 91.02667*  | 2.27974 | .000 | 82.9539  | 99.0995  |

\*. The significance level of the difference between the averages is 0.05.

**Table.S2 The post hoc comparison results of Naucleoxoside A among ten batch *N.officinalis* herbs**

|                  | (I) Batch  | (J) batch | Mean Difference<br>(I-J) | Standard<br>Error | Significance | 95% confidence interval |             |
|------------------|------------|-----------|--------------------------|-------------------|--------------|-------------------------|-------------|
|                  |            |           |                          |                   |              | Lower limit             | Upper limit |
| <b>Tukey HSD</b> | 161212     | 161220    | .40567                   | .36460            | .977         | -.8854                  | 1.6968      |
|                  |            | 160914    | -60.95767*               | .36460            | .000         | -62.2488                | -59.6666    |
|                  |            | 170911    | -25.92767*               | .36460            | .000         | -27.2188                | -24.6366    |
|                  |            | 180321    | -48.24433*               | .36460            | .000         | -49.5354                | -46.9532    |
|                  |            | 190330    | -48.15767*               | .36460            | .000         | -49.4488                | -46.8666    |
|                  |            | 200422    | -32.00767*               | .36460            | .000         | -33.2988                | -30.7166    |
|                  |            | 200428    | -51.85100*               | .36460            | .000         | -53.1421                | -50.5599    |
|                  |            | 200518    | -56.58767*               | .36460            | .000         | -57.8788                | -55.2966    |
|                  |            | 200602    | -36.53767*               | .36460            | .000         | -37.8288                | -35.2466    |
|                  |            |           | 161220                   | 161212            | -.40567      | .36460                  | .977        |
| 160914           | -61.36333* |           |                          | .36460            | .000         | -62.6544                | -60.0722    |
| 170911           | -26.33333* |           |                          | .36460            | .000         | -27.6244                | -25.0422    |
| 180321           | -48.65000* |           |                          | .36460            | .000         | -49.9411                | -47.3589    |
| 190330           | -48.56333* |           |                          | .36460            | .000         | -49.8544                | -47.2722    |
| 200422           | -32.41333* |           |                          | .36460            | .000         | -33.7044                | -31.1222    |
| 200428           | -52.25667* |           |                          | .36460            | .000         | -53.5478                | -50.9656    |
| 200518           | -56.99333* |           |                          | .36460            | .000         | -58.2844                | -55.7022    |
| 200602           | -36.94333* |           |                          | .36460            | .000         | -38.2344                | -35.6522    |
|                  | 160914     |           |                          | 161212            | 60.95767*    | .36460                  | .000        |
|                  |            | 161220    | 61.36333*                | .36460            | .000         | 60.0722                 | 62.6544     |
|                  |            | 170911    | 35.03000*                | .36460            | .000         | 33.7389                 | 36.3211     |
|                  |            | 180321    | 12.71333*                | .36460            | .000         | 11.4222                 | 14.0044     |
|                  |            | 190330    | 12.80000*                | .36460            | .000         | 11.5089                 | 14.0911     |
|                  |            | 200422    | 28.95000*                | .36460            | .000         | 27.6589                 | 30.2411     |
|                  |            | 200428    | 9.10667*                 | .36460            | .000         | 7.8156                  | 10.3978     |
|                  |            | 200518    | 4.37000*                 | .36460            | .000         | 3.0789                  | 5.6611      |
|                  |            | 200602    | 24.42000*                | .36460            | .000         | 23.1289                 | 25.7111     |
|                  |            |           | 170911                   | 161212            | 25.92767*    | .36460                  | .000        |
| 161220           | 26.33333*  |           |                          | .36460            | .000         | 25.0422                 | 27.6244     |

|        |        |            |        |       |          |          |
|--------|--------|------------|--------|-------|----------|----------|
|        | 160914 | -35.03000* | .36460 | .000  | -36.3211 | -33.7389 |
|        | 180321 | -22.31667* | .36460 | .000  | -23.6078 | -21.0256 |
|        | 190330 | -22.23000* | .36460 | .000  | -23.5211 | -20.9389 |
|        | 200422 | -6.08000*  | .36460 | .000  | -7.3711  | -4.7889  |
|        | 200428 | -25.92333* | .36460 | .000  | -27.2144 | -24.6322 |
|        | 200518 | -30.66000* | .36460 | .000  | -31.9511 | -29.3689 |
|        | 200602 | -10.61000* | .36460 | .000  | -11.9011 | -9.3189  |
| 180321 | 161212 | 48.24433*  | .36460 | .000  | 46.9532  | 49.5354  |
|        | 161220 | 48.65000*  | .36460 | .000  | 47.3589  | 49.9411  |
|        | 160914 | -12.71333* | .36460 | .000  | -14.0044 | -11.4222 |
|        | 170911 | 22.31667*  | .36460 | .000  | 21.0256  | 23.6078  |
|        | 190330 | .08667     | .36460 | 1.000 | -1.2044  | 1.3778   |
|        | 200422 | 16.23667*  | .36460 | .000  | 14.9456  | 17.5278  |
|        | 200428 | -3.60667*  | .36460 | .000  | -4.8978  | -2.3156  |
|        | 200518 | -8.34333*  | .36460 | .000  | -9.6344  | -7.0522  |
|        | 200602 | 11.70667*  | .36460 | .000  | 10.4156  | 12.9978  |
| 190330 | 161212 | 48.15767*  | .36460 | .000  | 46.8666  | 49.4488  |
|        | 161220 | 48.56333*  | .36460 | .000  | 47.2722  | 49.8544  |
|        | 160914 | -12.80000* | .36460 | .000  | -14.0911 | -11.5089 |
|        | 170911 | 22.23000*  | .36460 | .000  | 20.9389  | 23.5211  |
|        | 180321 | -.08667    | .36460 | 1.000 | -1.3778  | 1.2044   |
|        | 200422 | 16.15000*  | .36460 | .000  | 14.8589  | 17.4411  |
|        | 200428 | -3.69333*  | .36460 | .000  | -4.9844  | -2.4022  |
|        | 200518 | -8.43000*  | .36460 | .000  | -9.7211  | -7.1389  |
|        | 200602 | 11.62000*  | .36460 | .000  | 10.3289  | 12.9111  |
| 200422 | 161212 | 32.00767*  | .36460 | .000  | 30.7166  | 33.2988  |
|        | 161220 | 32.41333*  | .36460 | .000  | 31.1222  | 33.7044  |
|        | 160914 | -28.95000* | .36460 | .000  | -30.2411 | -27.6589 |
|        | 170911 | 6.08000*   | .36460 | .000  | 4.7889   | 7.3711   |
|        | 180321 | -16.23667* | .36460 | .000  | -17.5278 | -14.9456 |
|        | 190330 | -16.15000* | .36460 | .000  | -17.4411 | -14.8589 |
|        | 200428 | -19.84333* | .36460 | .000  | -21.1344 | -18.5522 |
|        | 200518 | -24.58000* | .36460 | .000  | -25.8711 | -23.2889 |
|        | 200602 | -4.53000*  | .36460 | .000  | -5.8211  | -3.2389  |
| 200428 | 161212 | 51.85100*  | .36460 | .000  | 50.5599  | 53.1421  |
|        | 161220 | 52.25667*  | .36460 | .000  | 50.9656  | 53.5478  |
|        | 160914 | -9.10667*  | .36460 | .000  | -10.3978 | -7.8156  |
|        | 170911 | 25.92333*  | .36460 | .000  | 24.6322  | 27.2144  |
|        | 180321 | 3.60667*   | .36460 | .000  | 2.3156   | 4.8978   |
|        | 190330 | 3.69333*   | .36460 | .000  | 2.4022   | 4.9844   |
|        | 200422 | 19.84333*  | .36460 | .000  | 18.5522  | 21.1344  |
|        | 200518 | -4.73667*  | .36460 | .000  | -6.0278  | -3.4456  |
|        | 200602 | 15.31333*  | .36460 | .000  | 14.0222  | 16.6044  |

|        |        |            |        |      |          |          |
|--------|--------|------------|--------|------|----------|----------|
| 200518 | 161212 | 56.58767*  | .36460 | .000 | 55.2966  | 57.8788  |
|        | 161220 | 56.99333*  | .36460 | .000 | 55.7022  | 58.2844  |
|        | 160914 | -4.37000*  | .36460 | .000 | -5.6611  | -3.0789  |
|        | 170911 | 30.66000*  | .36460 | .000 | 29.3689  | 31.9511  |
|        | 180321 | 8.34333*   | .36460 | .000 | 7.0522   | 9.6344   |
|        | 190330 | 8.43000*   | .36460 | .000 | 7.1389   | 9.7211   |
|        | 200422 | 24.58000*  | .36460 | .000 | 23.2889  | 25.8711  |
|        | 200428 | 4.73667*   | .36460 | .000 | 3.4456   | 6.0278   |
|        | 200602 | 20.05000*  | .36460 | .000 | 18.7589  | 21.3411  |
| 200602 | 161212 | 36.53767*  | .36460 | .000 | 35.2466  | 37.8288  |
|        | 161220 | 36.94333*  | .36460 | .000 | 35.6522  | 38.2344  |
|        | 160914 | -24.42000* | .36460 | .000 | -25.7111 | -23.1289 |
|        | 170911 | 10.61000*  | .36460 | .000 | 9.3189   | 11.9011  |
|        | 180321 | -11.70667* | .36460 | .000 | -12.9978 | -10.4156 |
|        | 190330 | -11.62000* | .36460 | .000 | -12.9111 | -10.3289 |
|        | 200422 | 4.53000*   | .36460 | .000 | 3.2389   | 5.8211   |
|        | 200428 | -15.31333* | .36460 | .000 | -16.6044 | -14.0222 |
|        | 200518 | -20.05000* | .36460 | .000 | -21.3411 | -18.7589 |

\*.The significance level of the difference between the averages is 0.05.

**Table.S3 The post hoc comparison results of Nauclefine among ten batch *N.officinalis* herbs**

|                  | (I) Batch | (J) batch | Mean Difference<br>(I-J) | Standard<br>Error | Significance | 95% confidence interval |             |
|------------------|-----------|-----------|--------------------------|-------------------|--------------|-------------------------|-------------|
|                  |           |           |                          |                   |              | Lower limit             | Upper limit |
| <b>Tukey HSD</b> | 161212    | 161220    | 6.51333*                 | .16772            | .000         | 5.9194                  | 7.1073      |
|                  |           | 160914    | 14.59667*                | .16772            | .000         | 14.0027                 | 15.1906     |
|                  |           | 170911    | 19.92333*                | .16772            | .000         | 19.3294                 | 20.5173     |
|                  |           | 180321    | 33.62333*                | .16772            | .000         | 33.0294                 | 34.2173     |
|                  |           | 190330    | 14.93667*                | .16772            | .000         | 14.3427                 | 15.5306     |
|                  |           | 200422    | 21.85333*                | .16772            | .000         | 21.2594                 | 22.4473     |
|                  |           | 200428    | 24.49667*                | .16772            | .000         | 23.9027                 | 25.0906     |
|                  |           | 200518    | 28.71333*                | .16772            | .000         | 28.1194                 | 29.3073     |
|                  |           | 200602    | 30.73000*                | .16772            | .000         | 30.1361                 | 31.3239     |
|                  | 161220    | 161212    | -6.51333*                | .16772            | .000         | -7.1073                 | -5.9194     |
|                  |           | 160914    | 8.08333*                 | .16772            | .000         | 7.4894                  | 8.6773      |
|                  |           | 170911    | 13.41000*                | .16772            | .000         | 12.8161                 | 14.0039     |
|                  |           | 180321    | 27.11000*                | .16772            | .000         | 26.5161                 | 27.7039     |
|                  |           | 190330    | 8.42333*                 | .16772            | .000         | 7.8294                  | 9.0173      |
|                  |           | 200422    | 15.34000*                | .16772            | .000         | 14.7461                 | 15.9339     |
|                  |           | 200428    | 17.98333*                | .16772            | .000         | 17.3894                 | 18.5773     |
|                  |           | 200518    | 22.20000*                | .16772            | .000         | 21.6061                 | 22.7939     |
|                  |           | 200602    | 24.21667*                | .16772            | .000         | 23.6227                 | 24.8106     |
|                  | 160914    | 161212    | -14.59667*               | .16772            | .000         | -15.1906                | -14.0027    |

|        |        |            |        |      |          |          |
|--------|--------|------------|--------|------|----------|----------|
|        | 161220 | -8.08333*  | .16772 | .000 | -8.6773  | -7.4894  |
|        | 170911 | 5.32667*   | .16772 | .000 | 4.7327   | 5.9206   |
|        | 180321 | 19.02667*  | .16772 | .000 | 18.4327  | 19.6206  |
|        | 190330 | .34000     | .16772 | .592 | -.2539   | .9339    |
|        | 200422 | 7.25667*   | .16772 | .000 | 6.6627   | 7.8506   |
|        | 200428 | 9.90000*   | .16772 | .000 | 9.3061   | 10.4939  |
|        | 200518 | 14.11667*  | .16772 | .000 | 13.5227  | 14.7106  |
|        | 200602 | 16.13333*  | .16772 | .000 | 15.5394  | 16.7273  |
| 170911 | 161212 | -19.92333* | .16772 | .000 | -20.5173 | -19.3294 |
|        | 161220 | -13.41000* | .16772 | .000 | -14.0039 | -12.8161 |
|        | 160914 | -5.32667*  | .16772 | .000 | -5.9206  | -4.7327  |
|        | 180321 | 13.70000*  | .16772 | .000 | 13.1061  | 14.2939  |
|        | 190330 | -4.98667*  | .16772 | .000 | -5.5806  | -4.3927  |
|        | 200422 | 1.93000*   | .16772 | .000 | 1.3361   | 2.5239   |
|        | 200428 | 4.57333*   | .16772 | .000 | 3.9794   | 5.1673   |
|        | 200518 | 8.79000*   | .16772 | .000 | 8.1961   | 9.3839   |
|        | 200602 | 10.80667*  | .16772 | .000 | 10.2127  | 11.4006  |
| 180321 | 161212 | -33.62333* | .16772 | .000 | -34.2173 | -33.0294 |
|        | 161220 | -27.11000* | .16772 | .000 | -27.7039 | -26.5161 |
|        | 160914 | -19.02667* | .16772 | .000 | -19.6206 | -18.4327 |
|        | 170911 | -13.70000* | .16772 | .000 | -14.2939 | -13.1061 |
|        | 190330 | -18.68667* | .16772 | .000 | -19.2806 | -18.0927 |
|        | 200422 | -11.77000* | .16772 | .000 | -12.3639 | -11.1761 |
|        | 200428 | -9.12667*  | .16772 | .000 | -9.7206  | -8.5327  |
|        | 200518 | -4.91000*  | .16772 | .000 | -5.5039  | -4.3161  |
|        | 200602 | -2.89333*  | .16772 | .000 | -3.4873  | -2.2994  |
| 190330 | 161212 | -14.93667* | .16772 | .000 | -15.5306 | -14.3427 |
|        | 161220 | -8.42333*  | .16772 | .000 | -9.0173  | -7.8294  |
|        | 160914 | -.34000    | .16772 | .592 | -.9339   | .2539    |
|        | 170911 | 4.98667*   | .16772 | .000 | 4.3927   | 5.5806   |
|        | 180321 | 18.68667*  | .16772 | .000 | 18.0927  | 19.2806  |
|        | 200422 | 6.91667*   | .16772 | .000 | 6.3227   | 7.5106   |
|        | 200428 | 9.56000*   | .16772 | .000 | 8.9661   | 10.1539  |
|        | 200518 | 13.77667*  | .16772 | .000 | 13.1827  | 14.3706  |
|        | 200602 | 15.79333*  | .16772 | .000 | 15.1994  | 16.3873  |
| 200422 | 161212 | -21.85333* | .16772 | .000 | -22.4473 | -21.2594 |
|        | 161220 | -15.34000* | .16772 | .000 | -15.9339 | -14.7461 |
|        | 160914 | -7.25667*  | .16772 | .000 | -7.8506  | -6.6627  |
|        | 170911 | -1.93000*  | .16772 | .000 | -2.5239  | -1.3361  |
|        | 180321 | 11.77000*  | .16772 | .000 | 11.1761  | 12.3639  |
|        | 190330 | -6.91667*  | .16772 | .000 | -7.5106  | -6.3227  |
|        | 200428 | 2.64333*   | .16772 | .000 | 2.0494   | 3.2373   |
|        | 200518 | 6.86000*   | .16772 | .000 | 6.2661   | 7.4539   |

|        |        |            |        |      |          |          |
|--------|--------|------------|--------|------|----------|----------|
|        | 200602 | 8.87667*   | .16772 | .000 | 8.2827   | 9.4706   |
| 200428 | 161212 | -24.49667* | .16772 | .000 | -25.0906 | -23.9027 |
|        | 161220 | -17.98333* | .16772 | .000 | -18.5773 | -17.3894 |
|        | 160914 | -9.90000*  | .16772 | .000 | -10.4939 | -9.3061  |
|        | 170911 | -4.57333*  | .16772 | .000 | -5.1673  | -3.9794  |
|        | 180321 | 9.12667*   | .16772 | .000 | 8.5327   | 9.7206   |
|        | 190330 | -9.56000*  | .16772 | .000 | -10.1539 | -8.9661  |
|        | 200422 | -2.64333*  | .16772 | .000 | -3.2373  | -2.0494  |
|        | 200518 | 4.21667*   | .16772 | .000 | 3.6227   | 4.8106   |
|        | 200602 | 6.23333*   | .16772 | .000 | 5.6394   | 6.8273   |
| 200518 | 161212 | -28.71333* | .16772 | .000 | -29.3073 | -28.1194 |
|        | 161220 | -22.20000* | .16772 | .000 | -22.7939 | -21.6061 |
|        | 160914 | -14.11667* | .16772 | .000 | -14.7106 | -13.5227 |
|        | 170911 | -8.79000*  | .16772 | .000 | -9.3839  | -8.1961  |
|        | 180321 | 4.91000*   | .16772 | .000 | 4.3161   | 5.5039   |
|        | 190330 | -13.77667* | .16772 | .000 | -14.3706 | -13.1827 |
|        | 200422 | -6.86000*  | .16772 | .000 | -7.4539  | -6.2661  |
|        | 200428 | -4.21667*  | .16772 | .000 | -4.8106  | -3.6227  |
|        | 200602 | 2.01667*   | .16772 | .000 | 1.4227   | 2.6106   |
| 200602 | 161212 | -30.73000* | .16772 | .000 | -31.3239 | -30.1361 |
|        | 161220 | -24.21667* | .16772 | .000 | -24.8106 | -23.6227 |
|        | 160914 | -16.13333* | .16772 | .000 | -16.7273 | -15.5394 |
|        | 170911 | -10.80667* | .16772 | .000 | -11.4006 | -10.2127 |
|        | 180321 | 2.89333*   | .16772 | .000 | 2.2994   | 3.4873   |
|        | 190330 | -15.79333* | .16772 | .000 | -16.3873 | -15.1994 |
|        | 200422 | -8.87667*  | .16772 | .000 | -9.4706  | -8.2827  |
|        | 200428 | -6.23333*  | .16772 | .000 | -6.8273  | -5.6394  |
|        | 200518 | -2.01667*  | .16772 | .000 | -2.6106  | -1.4227  |

\*.The significance level of the difference between the averages is 0.05.

**Table.S4 The post hoc comparison results of Naucleoxoside B among ten batch *N.officinalis* herbs**

|                  | (I) Batch | (J) batch | Mean Difference | Standard | Significance | 95% confidence interval |             |
|------------------|-----------|-----------|-----------------|----------|--------------|-------------------------|-------------|
|                  |           |           | (I-J)           | Error    |              | Lower limit             | Upper limit |
| <b>Tukey HSD</b> | 161212    | 161220    | -5.25900*       | .57162   | .000         | -7.2832                 | -3.2348     |
|                  |           | 160914    | -33.67567*      | .57162   | .000         | -35.6998                | -31.6515    |
|                  |           | 170911    | 2.89433*        | .57162   | .002         | .8702                   | 4.9185      |
|                  |           | 180321    | -12.17567*      | .57162   | .000         | -14.1998                | -10.1515    |
|                  |           | 190330    | -20.47233*      | .57162   | .000         | -22.4965                | -18.4482    |
|                  |           | 200422    | 1.34100         | .57162   | .404         | -.6832                  | 3.3652      |
|                  |           | 200428    | -7.38233*       | .57162   | .000         | -9.4065                 | -5.3582     |
|                  |           | 200518    | -17.50233*      | .57162   | .000         | -19.5265                | -15.4782    |
|                  |           | 200602    | .41767          | .57162   | .999         | -1.6065                 | 2.4418      |

|        |        |            |        |      |          |          |
|--------|--------|------------|--------|------|----------|----------|
| 161220 | 161212 | 5.25900*   | .57162 | .000 | 3.2348   | 7.2832   |
|        | 160914 | -28.41667* | .57162 | .000 | -30.4408 | -26.3925 |
|        | 170911 | 8.15333*   | .57162 | .000 | 6.1292   | 10.1775  |
|        | 180321 | -6.91667*  | .57162 | .000 | -8.9408  | -4.8925  |
|        | 190330 | -15.21333* | .57162 | .000 | -17.2375 | -13.1892 |
|        | 200422 | 6.60000*   | .57162 | .000 | 4.5758   | 8.6242   |
|        | 200428 | -2.12333*  | .57162 | .035 | -4.1475  | -.0992   |
|        | 200518 | -12.24333* | .57162 | .000 | -14.2675 | -10.2192 |
|        | 200602 | 5.67667*   | .57162 | .000 | 3.6525   | 7.7008   |
| 160914 | 161212 | 33.67567*  | .57162 | .000 | 31.6515  | 35.6998  |
|        | 161220 | 28.41667*  | .57162 | .000 | 26.3925  | 30.4408  |
|        | 170911 | 36.57000*  | .57162 | .000 | 34.5458  | 38.5942  |
|        | 180321 | 21.50000*  | .57162 | .000 | 19.4758  | 23.5242  |
|        | 190330 | 13.20333*  | .57162 | .000 | 11.1792  | 15.2275  |
|        | 200422 | 35.01667*  | .57162 | .000 | 32.9925  | 37.0408  |
|        | 200428 | 26.29333*  | .57162 | .000 | 24.2692  | 28.3175  |
|        | 200518 | 16.17333*  | .57162 | .000 | 14.1492  | 18.1975  |
|        | 200602 | 34.09333*  | .57162 | .000 | 32.0692  | 36.1175  |
| 170911 | 161212 | -2.89433*  | .57162 | .002 | -4.9185  | -.8702   |
|        | 161220 | -8.15333*  | .57162 | .000 | -10.1775 | -6.1292  |
|        | 160914 | -36.57000* | .57162 | .000 | -38.5942 | -34.5458 |
|        | 180321 | -15.07000* | .57162 | .000 | -17.0942 | -13.0458 |
|        | 190330 | -23.36667* | .57162 | .000 | -25.3908 | -21.3425 |
|        | 200422 | -1.55333   | .57162 | .231 | -3.5775  | .4708    |
|        | 200428 | -10.27667* | .57162 | .000 | -12.3008 | -8.2525  |
|        | 200518 | -20.39667* | .57162 | .000 | -22.4208 | -18.3725 |
|        | 200602 | -2.47667*  | .57162 | .009 | -4.5008  | -.4525   |
| 180321 | 161212 | 12.17567*  | .57162 | .000 | 10.1515  | 14.1998  |
|        | 161220 | 6.91667*   | .57162 | .000 | 4.8925   | 8.9408   |
|        | 160914 | -21.50000* | .57162 | .000 | -23.5242 | -19.4758 |
|        | 170911 | 15.07000*  | .57162 | .000 | 13.0458  | 17.0942  |
|        | 190330 | -8.29667*  | .57162 | .000 | -10.3208 | -6.2725  |
|        | 200422 | 13.51667*  | .57162 | .000 | 11.4925  | 15.5408  |
|        | 200428 | 4.79333*   | .57162 | .000 | 2.7692   | 6.8175   |
|        | 200518 | -5.32667*  | .57162 | .000 | -7.3508  | -3.3025  |
|        | 200602 | 12.59333*  | .57162 | .000 | 10.5692  | 14.6175  |
| 190330 | 161212 | 20.47233*  | .57162 | .000 | 18.4482  | 22.4965  |
|        | 161220 | 15.21333*  | .57162 | .000 | 13.1892  | 17.2375  |
|        | 160914 | -13.20333* | .57162 | .000 | -15.2275 | -11.1792 |
|        | 170911 | 23.36667*  | .57162 | .000 | 21.3425  | 25.3908  |
|        | 180321 | 8.29667*   | .57162 | .000 | 6.2725   | 10.3208  |
|        | 200422 | 21.81333*  | .57162 | .000 | 19.7892  | 23.8375  |
|        | 200428 | 13.09000*  | .57162 | .000 | 11.0658  | 15.1142  |



|        |        |            |        |      |          |          |
|--------|--------|------------|--------|------|----------|----------|
|        | 200518 | 2.97000*   | .57162 | .001 | .9458    | 4.9942   |
|        | 200602 | 20.89000*  | .57162 | .000 | 18.8658  | 22.9142  |
| 200422 | 161212 | -1.34100   | .57162 | .404 | -3.3652  | .6832    |
|        | 161220 | -6.60000*  | .57162 | .000 | -8.6242  | -4.5758  |
|        | 160914 | -35.01667* | .57162 | .000 | -37.0408 | -32.9925 |
|        | 170911 | 1.55333    | .57162 | .231 | -.4708   | 3.5775   |
|        | 180321 | -13.51667* | .57162 | .000 | -15.5408 | -11.4925 |
|        | 190330 | -21.81333* | .57162 | .000 | -23.8375 | -19.7892 |
|        | 200428 | -8.72333*  | .57162 | .000 | -10.7475 | -6.6992  |
|        | 200518 | -18.84333* | .57162 | .000 | -20.8675 | -16.8192 |
|        | 200602 | -.92333    | .57162 | .826 | -2.9475  | 1.1008   |
| 200428 | 161212 | 7.38233*   | .57162 | .000 | 5.3582   | 9.4065   |
|        | 161220 | 2.12333*   | .57162 | .035 | .0992    | 4.1475   |
|        | 160914 | -26.29333* | .57162 | .000 | -28.3175 | -24.2692 |
|        | 170911 | 10.27667*  | .57162 | .000 | 8.2525   | 12.3008  |
|        | 180321 | -4.79333*  | .57162 | .000 | -6.8175  | -2.7692  |
|        | 190330 | -13.09000* | .57162 | .000 | -15.1142 | -11.0658 |
|        | 200422 | 8.72333*   | .57162 | .000 | 6.6992   | 10.7475  |
|        | 200518 | -10.12000* | .57162 | .000 | -12.1442 | -8.0958  |
|        | 200602 | 7.80000*   | .57162 | .000 | 5.7758   | 9.8242   |
| 200518 | 161212 | 17.50233*  | .57162 | .000 | 15.4782  | 19.5265  |
|        | 161220 | 12.24333*  | .57162 | .000 | 10.2192  | 14.2675  |
|        | 160914 | -16.17333* | .57162 | .000 | -18.1975 | -14.1492 |
|        | 170911 | 20.39667*  | .57162 | .000 | 18.3725  | 22.4208  |
|        | 180321 | 5.32667*   | .57162 | .000 | 3.3025   | 7.3508   |
|        | 190330 | -2.97000*  | .57162 | .001 | -4.9942  | -.9458   |
|        | 200422 | 18.84333*  | .57162 | .000 | 16.8192  | 20.8675  |
|        | 200428 | 10.12000*  | .57162 | .000 | 8.0958   | 12.1442  |
|        | 200602 | 17.92000*  | .57162 | .000 | 15.8958  | 19.9442  |
| 200602 | 161212 | -.41767    | .57162 | .999 | -2.4418  | 1.6065   |
|        | 161220 | -5.67667*  | .57162 | .000 | -7.7008  | -3.6525  |
|        | 160914 | -34.09333* | .57162 | .000 | -36.1175 | -32.0692 |
|        | 170911 | 2.47667*   | .57162 | .009 | .4525    | 4.5008   |
|        | 180321 | -12.59333* | .57162 | .000 | -14.6175 | -10.5692 |
|        | 190330 | -20.89000* | .57162 | .000 | -22.9142 | -18.8658 |
|        | 200422 | .92333     | .57162 | .826 | -1.1008  | 2.9475   |
|        | 200428 | -7.80000*  | .57162 | .000 | -9.8242  | -5.7758  |
|        | 200518 | -17.92000* | .57162 | .000 | -19.9442 | -15.8958 |

\*.The significance level of the difference between the averages is 0.05.

**Table.S5 The post hoc comparison results of Angustidine among ten batch *N.officinalis* herbs**

|                  | (I) Batch  | (J) batch | Mean Difference<br>(I-J) | Standard<br>Error | Significance | 95% confidence interval |             |
|------------------|------------|-----------|--------------------------|-------------------|--------------|-------------------------|-------------|
|                  |            |           |                          |                   |              | Lower limit             | Upper limit |
| <b>Tukey HSD</b> | 161212     | 161220    | 2.37233*                 | .30612            | .000         | 1.2883                  | 3.4563      |
|                  |            | 160914    | 11.31900*                | .30612            | .000         | 10.2350                 | 12.4030     |
|                  |            | 170911    | -48.27100*               | .30612            | .000         | -49.3550                | -47.1870    |
|                  |            | 180321    | 17.33233*                | .30612            | .000         | 16.2483                 | 18.4163     |
|                  |            | 190330    | -18.85100*               | .30612            | .000         | -19.9350                | -17.7670    |
|                  |            | 200422    | -15.64433*               | .30612            | .000         | -16.7283                | -14.5603    |
|                  |            | 200428    | 24.60567*                | .30612            | .000         | 23.5217                 | 25.6897     |
|                  |            | 200518    | 24.38900*                | .30612            | .000         | 23.3050                 | 25.4730     |
|                  |            | 200602    | 27.05233*                | .30612            | .000         | 25.9683                 | 28.1363     |
|                  |            |           | 161220                   | 161212            | -2.37233*    | .30612                  | .000        |
| 160914           | 8.94667*   |           |                          | .30612            | .000         | 7.8627                  | 10.0307     |
| 170911           | -50.64333* |           |                          | .30612            | .000         | -51.7273                | -49.5593    |
| 180321           | 14.96000*  |           |                          | .30612            | .000         | 13.8760                 | 16.0440     |
| 190330           | -21.22333* |           |                          | .30612            | .000         | -22.3073                | -20.1393    |
| 200422           | -18.01667* |           |                          | .30612            | .000         | -19.1007                | -16.9327    |
| 200428           | 22.23333*  |           |                          | .30612            | .000         | 21.1493                 | 23.3173     |
| 200518           | 22.01667*  |           |                          | .30612            | .000         | 20.9327                 | 23.1007     |
| 200602           | 24.68000*  |           |                          | .30612            | .000         | 23.5960                 | 25.7640     |
|                  | 160914     |           |                          | 161212            | -11.31900*   | .30612                  | .000        |
|                  |            | 161220    | -8.94667*                | .30612            | .000         | -10.0307                | -7.8627     |
|                  |            | 170911    | -59.59000*               | .30612            | .000         | -60.6740                | -58.5060    |
|                  |            | 180321    | 6.01333*                 | .30612            | .000         | 4.9293                  | 7.0973      |
|                  |            | 190330    | -30.17000*               | .30612            | .000         | -31.2540                | -29.0860    |
|                  |            | 200422    | -26.96333*               | .30612            | .000         | -28.0473                | -25.8793    |
|                  |            | 200428    | 13.28667*                | .30612            | .000         | 12.2027                 | 14.3707     |
|                  |            | 200518    | 13.07000*                | .30612            | .000         | 11.9860                 | 14.1540     |
|                  |            | 200602    | 15.73333*                | .30612            | .000         | 14.6493                 | 16.8173     |
|                  |            |           | 170911                   | 161212            | 48.27100*    | .30612                  | .000        |
| 161220           | 50.64333*  |           |                          | .30612            | .000         | 49.5593                 | 51.7273     |
| 160914           | 59.59000*  |           |                          | .30612            | .000         | 58.5060                 | 60.6740     |
| 180321           | 65.60333*  |           |                          | .30612            | .000         | 64.5193                 | 66.6873     |
| 190330           | 29.42000*  |           |                          | .30612            | .000         | 28.3360                 | 30.5040     |
| 200422           | 32.62667*  |           |                          | .30612            | .000         | 31.5427                 | 33.7107     |
| 200428           | 72.87667*  |           |                          | .30612            | .000         | 71.7927                 | 73.9607     |
| 200518           | 72.66000*  |           |                          | .30612            | .000         | 71.5760                 | 73.7440     |
| 200602           | 75.32333*  |           |                          | .30612            | .000         | 74.2393                 | 76.4073     |
|                  | 180321     |           |                          | 161212            | -17.33233*   | .30612                  | .000        |
|                  |            | 161220    | -14.96000*               | .30612            | .000         | -16.0440                | -13.8760    |
|                  |            | 160914    | -6.01333*                | .30612            | .000         | -7.0973                 | -4.9293     |

|        |        |            |        |      |          |          |
|--------|--------|------------|--------|------|----------|----------|
|        | 170911 | -65.60333* | .30612 | .000 | -66.6873 | -64.5193 |
|        | 190330 | -36.18333* | .30612 | .000 | -37.2673 | -35.0993 |
|        | 200422 | -32.97667* | .30612 | .000 | -34.0607 | -31.8927 |
|        | 200428 | 7.27333*   | .30612 | .000 | 6.1893   | 8.3573   |
|        | 200518 | 7.05667*   | .30612 | .000 | 5.9727   | 8.1407   |
|        | 200602 | 9.72000*   | .30612 | .000 | 8.6360   | 10.8040  |
| 190330 | 161212 | 18.85100*  | .30612 | .000 | 17.7670  | 19.9350  |
|        | 161220 | 21.22333*  | .30612 | .000 | 20.1393  | 22.3073  |
|        | 160914 | 30.17000*  | .30612 | .000 | 29.0860  | 31.2540  |
|        | 170911 | -29.42000* | .30612 | .000 | -30.5040 | -28.3360 |
|        | 180321 | 36.18333*  | .30612 | .000 | 35.0993  | 37.2673  |
|        | 200422 | 3.20667*   | .30612 | .000 | 2.1227   | 4.2907   |
|        | 200428 | 43.45667*  | .30612 | .000 | 42.3727  | 44.5407  |
|        | 200518 | 43.24000*  | .30612 | .000 | 42.1560  | 44.3240  |
|        | 200602 | 45.90333*  | .30612 | .000 | 44.8193  | 46.9873  |
| 200422 | 161212 | 15.64433*  | .30612 | .000 | 14.5603  | 16.7283  |
|        | 161220 | 18.01667*  | .30612 | .000 | 16.9327  | 19.1007  |
|        | 160914 | 26.96333*  | .30612 | .000 | 25.8793  | 28.0473  |
|        | 170911 | -32.62667* | .30612 | .000 | -33.7107 | -31.5427 |
|        | 180321 | 32.97667*  | .30612 | .000 | 31.8927  | 34.0607  |
|        | 190330 | -3.20667*  | .30612 | .000 | -4.2907  | -2.1227  |
|        | 200428 | 40.25000*  | .30612 | .000 | 39.1660  | 41.3340  |
|        | 200518 | 40.03333*  | .30612 | .000 | 38.9493  | 41.1173  |
|        | 200602 | 42.69667*  | .30612 | .000 | 41.6127  | 43.7807  |
| 200428 | 161212 | -24.60567* | .30612 | .000 | -25.6897 | -23.5217 |
|        | 161220 | -22.23333* | .30612 | .000 | -23.3173 | -21.1493 |
|        | 160914 | -13.28667* | .30612 | .000 | -14.3707 | -12.2027 |
|        | 170911 | -72.87667* | .30612 | .000 | -73.9607 | -71.7927 |
|        | 180321 | -7.27333*  | .30612 | .000 | -8.3573  | -6.1893  |
|        | 190330 | -43.45667* | .30612 | .000 | -44.5407 | -42.3727 |
|        | 200422 | -40.25000* | .30612 | .000 | -41.3340 | -39.1660 |
|        | 200518 | -.21667    | .30612 | .999 | -1.3007  | .8673    |
|        | 200602 | 2.44667*   | .30612 | .000 | 1.3627   | 3.5307   |
| 200518 | 161212 | -24.38900* | .30612 | .000 | -25.4730 | -23.3050 |
|        | 161220 | -22.01667* | .30612 | .000 | -23.1007 | -20.9327 |
|        | 160914 | -13.07000* | .30612 | .000 | -14.1540 | -11.9860 |
|        | 170911 | -72.66000* | .30612 | .000 | -73.7440 | -71.5760 |
|        | 180321 | -7.05667*  | .30612 | .000 | -8.1407  | -5.9727  |
|        | 190330 | -43.24000* | .30612 | .000 | -44.3240 | -42.1560 |
|        | 200422 | -40.03333* | .30612 | .000 | -41.1173 | -38.9493 |
|        | 200428 | .21667     | .30612 | .999 | -.8673   | 1.3007   |
|        | 200602 | 2.66333*   | .30612 | .000 | 1.5793   | 3.7473   |
| 200602 | 161212 | -27.05233* | .30612 | .000 | -28.1363 | -25.9683 |

|        |            |        |      |          |          |
|--------|------------|--------|------|----------|----------|
| 161220 | -24.68000* | .30612 | .000 | -25.7640 | -23.5960 |
| 160914 | -15.73333* | .30612 | .000 | -16.8173 | -14.6493 |
| 170911 | -75.32333* | .30612 | .000 | -76.4073 | -74.2393 |
| 180321 | -9.72000*  | .30612 | .000 | -10.8040 | -8.6360  |
| 190330 | -45.90333* | .30612 | .000 | -46.9873 | -44.8193 |
| 200422 | -42.69667* | .30612 | .000 | -43.7807 | -41.6127 |
| 200428 | -2.44667*  | .30612 | .000 | -3.5307  | -1.3627  |
| 200518 | -2.66333*  | .30612 | .000 | -3.7473  | -1.5793  |

\*.The significance level of the difference between the averages is 0.05.

**Table.S6 The post hoc comparison results of Angustoline among ten batch *N.officinalis* herbs**

|                  | (I) Batch   | (J) batch | Mean Difference<br>(I-J) | Standard<br>Error | Significance | 95% confidence interval |             |
|------------------|-------------|-----------|--------------------------|-------------------|--------------|-------------------------|-------------|
|                  |             |           |                          |                   |              | Lower limit             | Upper limit |
| <b>Tukey HSD</b> | 161212      | 161220    | -1.66600*                | .22228            | .000         | -2.4531                 | -.8789      |
|                  |             | 160914    | 4.26067*                 | .22228            | .000         | 3.4735                  | 5.0478      |
|                  |             | 170911    | -67.73267*               | .22228            | .000         | -68.5198                | -66.9455    |
|                  |             | 180321    | 15.02400*                | .22228            | .000         | 14.2369                 | 15.8111     |
|                  |             | 190330    | -30.06933*               | .22228            | .000         | -30.8565                | -29.2822    |
|                  |             | 200422    | -224.50600*              | .22228            | .000         | -225.2931               | -223.7189   |
|                  |             | 200428    | 11.69067*                | .22228            | .000         | 10.9035                 | 12.4778     |
|                  |             | 200518    | 14.82400*                | .22228            | .000         | 14.0369                 | 15.6111     |
|                  |             | 200602    | 23.17400*                | .22228            | .000         | 22.3869                 | 23.9611     |
|                  |             |           | 161220                   | 161212            | 1.66600*     | .22228                  | .000        |
| 160914           | 5.92667*    |           |                          | .22228            | .000         | 5.1395                  | 6.7138      |
| 170911           | -66.06667*  |           |                          | .22228            | .000         | -66.8538                | -65.2795    |
| 180321           | 16.69000*   |           |                          | .22228            | .000         | 15.9029                 | 17.4771     |
| 190330           | -28.40333*  |           |                          | .22228            | .000         | -29.1905                | -27.6162    |
| 200422           | -222.84000* |           |                          | .22228            | .000         | -223.6271               | -222.0529   |
| 200428           | 13.35667*   |           |                          | .22228            | .000         | 12.5695                 | 14.1438     |
| 200518           | 16.49000*   |           |                          | .22228            | .000         | 15.7029                 | 17.2771     |
| 200602           | 24.84000*   |           |                          | .22228            | .000         | 24.0529                 | 25.6271     |
|                  | 160914      |           |                          | 161212            | -4.26067*    | .22228                  | .000        |
|                  |             | 161220    | -5.92667*                | .22228            | .000         | -6.7138                 | -5.1395     |
|                  |             | 170911    | -71.99333*               | .22228            | .000         | -72.7805                | -71.2062    |
|                  |             | 180321    | 10.76333*                | .22228            | .000         | 9.9762                  | 11.5505     |
|                  |             | 190330    | -34.33000*               | .22228            | .000         | -35.1171                | -33.5429    |
|                  |             | 200422    | -228.76667*              | .22228            | .000         | -229.5538               | -227.9795   |
|                  |             | 200428    | 7.43000*                 | .22228            | .000         | 6.6429                  | 8.2171      |
|                  |             | 200518    | 10.56333*                | .22228            | .000         | 9.7762                  | 11.3505     |
|                  |             | 200602    | 18.91333*                | .22228            | .000         | 18.1262                 | 19.7005     |
|                  |             |           | 170911                   | 161212            | 67.73267*    | .22228                  | .000        |
| 161220           | 66.06667*   |           |                          | .22228            | .000         | 65.2795                 | 66.8538     |

|        |        |             |        |      |           |           |
|--------|--------|-------------|--------|------|-----------|-----------|
|        | 160914 | 71.99333*   | .22228 | .000 | 71.2062   | 72.7805   |
|        | 180321 | 82.75667*   | .22228 | .000 | 81.9695   | 83.5438   |
|        | 190330 | 37.66333*   | .22228 | .000 | 36.8762   | 38.4505   |
|        | 200422 | -156.77333* | .22228 | .000 | -157.5605 | -155.9862 |
|        | 200428 | 79.42333*   | .22228 | .000 | 78.6362   | 80.2105   |
|        | 200518 | 82.55667*   | .22228 | .000 | 81.7695   | 83.3438   |
|        | 200602 | 90.90667*   | .22228 | .000 | 90.1195   | 91.6938   |
| 180321 | 161212 | -15.02400*  | .22228 | .000 | -15.8111  | -14.2369  |
|        | 161220 | -16.69000*  | .22228 | .000 | -17.4771  | -15.9029  |
|        | 160914 | -10.76333*  | .22228 | .000 | -11.5505  | -9.9762   |
|        | 170911 | -82.75667*  | .22228 | .000 | -83.5438  | -81.9695  |
|        | 190330 | -45.09333*  | .22228 | .000 | -45.8805  | -44.3062  |
|        | 200422 | -239.53000* | .22228 | .000 | -240.3171 | -238.7429 |
|        | 200428 | -3.33333*   | .22228 | .000 | -4.1205   | -2.5462   |
|        | 200518 | -.20000     | .22228 | .995 | -.9871    | .5871     |
|        | 200602 | 8.15000*    | .22228 | .000 | 7.3629    | 8.9371    |
| 190330 | 161212 | 30.06933*   | .22228 | .000 | 29.2822   | 30.8565   |
|        | 161220 | 28.40333*   | .22228 | .000 | 27.6162   | 29.1905   |
|        | 160914 | 34.33000*   | .22228 | .000 | 33.5429   | 35.1171   |
|        | 170911 | -37.66333*  | .22228 | .000 | -38.4505  | -36.8762  |
|        | 180321 | 45.09333*   | .22228 | .000 | 44.3062   | 45.8805   |
|        | 200422 | -194.43667* | .22228 | .000 | -195.2238 | -193.6495 |
|        | 200428 | 41.76000*   | .22228 | .000 | 40.9729   | 42.5471   |
|        | 200518 | 44.89333*   | .22228 | .000 | 44.1062   | 45.6805   |
|        | 200602 | 53.24333*   | .22228 | .000 | 52.4562   | 54.0305   |
| 200422 | 161212 | 224.50600*  | .22228 | .000 | 223.7189  | 225.2931  |
|        | 161220 | 222.84000*  | .22228 | .000 | 222.0529  | 223.6271  |
|        | 160914 | 228.76667*  | .22228 | .000 | 227.9795  | 229.5538  |
|        | 170911 | 156.77333*  | .22228 | .000 | 155.9862  | 157.5605  |
|        | 180321 | 239.53000*  | .22228 | .000 | 238.7429  | 240.3171  |
|        | 190330 | 194.43667*  | .22228 | .000 | 193.6495  | 195.2238  |
|        | 200428 | 236.19667*  | .22228 | .000 | 235.4095  | 236.9838  |
|        | 200518 | 239.33000*  | .22228 | .000 | 238.5429  | 240.1171  |
|        | 200602 | 247.68000*  | .22228 | .000 | 246.8929  | 248.4671  |
| 200428 | 161212 | -11.69067*  | .22228 | .000 | -12.4778  | -10.9035  |
|        | 161220 | -13.35667*  | .22228 | .000 | -14.1438  | -12.5695  |
|        | 160914 | -7.43000*   | .22228 | .000 | -8.2171   | -6.6429   |
|        | 170911 | -79.42333*  | .22228 | .000 | -80.2105  | -78.6362  |
|        | 180321 | 3.33333*    | .22228 | .000 | 2.5462    | 4.1205    |
|        | 190330 | -41.76000*  | .22228 | .000 | -42.5471  | -40.9729  |
|        | 200422 | -236.19667* | .22228 | .000 | -236.9838 | -235.4095 |
|        | 200518 | 3.13333*    | .22228 | .000 | 2.3462    | 3.9205    |
|        | 200602 | 11.48333*   | .22228 | .000 | 10.6962   | 12.2705   |

|        |        |             |        |      |           |           |
|--------|--------|-------------|--------|------|-----------|-----------|
| 200518 | 161212 | -14.82400*  | .22228 | .000 | -15.6111  | -14.0369  |
|        | 161220 | -16.49000*  | .22228 | .000 | -17.2771  | -15.7029  |
|        | 160914 | -10.56333*  | .22228 | .000 | -11.3505  | -9.7762   |
|        | 170911 | -82.55667*  | .22228 | .000 | -83.3438  | -81.7695  |
|        | 180321 | .20000      | .22228 | .995 | -.5871    | .9871     |
|        | 190330 | -44.89333*  | .22228 | .000 | -45.6805  | -44.1062  |
|        | 200422 | -239.33000* | .22228 | .000 | -240.1171 | -238.5429 |
|        | 200428 | -3.13333*   | .22228 | .000 | -3.9205   | -2.3462   |
|        | 200602 | 8.35000*    | .22228 | .000 | 7.5629    | 9.1371    |
| 200602 | 161212 | -23.17400*  | .22228 | .000 | -23.9611  | -22.3869  |
|        | 161220 | -24.84000*  | .22228 | .000 | -25.6271  | -24.0529  |
|        | 160914 | -18.91333*  | .22228 | .000 | -19.7005  | -18.1262  |
|        | 170911 | -90.90667*  | .22228 | .000 | -91.6938  | -90.1195  |
|        | 180321 | -8.15000*   | .22228 | .000 | -8.9371   | -7.3629   |
|        | 190330 | -53.24333*  | .22228 | .000 | -54.0305  | -52.4562  |
|        | 200422 | -247.68000* | .22228 | .000 | -248.4671 | -246.8929 |
|        | 200428 | -11.48333*  | .22228 | .000 | -12.2705  | -10.6962  |
|        | 200518 | -8.35000*   | .22228 | .000 | -9.1371   | -7.5629   |

\*.The significance level of the difference between the averages is 0.05.

**Table.S7 The post hoc comparison results of (3*S*,19*S*)-3,14-dihydroangustoline,  $[\alpha]_D^{20}$ : (-)191° among ten batch *N.officinalis* herbs**

|                  | (I) Batch | (J) batch | Mean Difference | Standard | Significance | 95% confidence interval |             |
|------------------|-----------|-----------|-----------------|----------|--------------|-------------------------|-------------|
|                  |           |           | (I-J)           | Error    |              | Lower limit             | Upper limit |
| <b>Tukey HSD</b> | 161212    | 161220    | 5.21400*        | 1.21367  | .010         | .9163                   | 9.5117      |
|                  |           | 160914    | .53733          | 1.21367  | 1.000        | -3.7604                 | 4.8351      |
|                  |           | 170911    | -83.75267*      | 1.21367  | .000         | -88.0504                | -79.4549    |
|                  |           | 180321    | 22.08067*       | 1.21367  | .000         | 17.7829                 | 26.3784     |
|                  |           | 190330    | -36.23267*      | 1.21367  | .000         | -40.5304                | -31.9349    |
|                  |           | 200422    | -384.97933*     | 1.21367  | .000         | -389.2771               | -380.6816   |
|                  |           | 200428    | .79400          | 1.21367  | 1.000        | -3.5037                 | 5.0917      |
|                  |           | 200518    | 4.41733*        | 1.21367  | .041         | .1196                   | 8.7151      |
|                  |           | 200602    | 16.75067*       | 1.21367  | .000         | 12.4529                 | 21.0484     |
|                  | 161220    | 161212    | -5.21400*       | 1.21367  | .010         | -9.5117                 | -9.9163     |
|                  |           | 160914    | -4.67667*       | 1.21367  | .026         | -8.9744                 | -3.789      |
|                  |           | 170911    | -88.96667*      | 1.21367  | .000         | -93.2644                | -84.6689    |
|                  |           | 180321    | 16.86667*       | 1.21367  | .000         | 12.5689                 | 21.1644     |
|                  |           | 190330    | -41.44667*      | 1.21367  | .000         | -45.7444                | -37.1489    |
|                  |           | 200422    | -390.19333*     | 1.21367  | .000         | -394.4911               | -385.8956   |
|                  |           | 200428    | -4.42000*       | 1.21367  | .041         | -8.7177                 | -1.1223     |
|                  |           | 200518    | -.79667         | 1.21367  | 1.000        | -5.0944                 | 3.5011      |
|                  |           | 200602    | 11.53667*       | 1.21367  | .000         | 7.2389                  | 15.8344     |

|        |        |             |         |       |           |           |
|--------|--------|-------------|---------|-------|-----------|-----------|
| 160914 | 161212 | -.53733     | 1.21367 | 1.000 | -4.8351   | 3.7604    |
|        | 161220 | 4.67667*    | 1.21367 | .026  | .3789     | 8.9744    |
|        | 170911 | -84.29000*  | 1.21367 | .000  | -88.5877  | -79.9923  |
|        | 180321 | 21.54333*   | 1.21367 | .000  | 17.2456   | 25.8411   |
|        | 190330 | -36.77000*  | 1.21367 | .000  | -41.0677  | -32.4723  |
|        | 200422 | -385.51667* | 1.21367 | .000  | -389.8144 | -381.2189 |
|        | 200428 | .25667      | 1.21367 | 1.000 | -4.0411   | 4.5544    |
|        | 200518 | 3.88000     | 1.21367 | .098  | -.4177    | 8.1777    |
|        | 200602 | 16.21333*   | 1.21367 | .000  | 11.9156   | 20.5111   |
| 170911 | 161212 | 83.75267*   | 1.21367 | .000  | 79.4549   | 88.0504   |
|        | 161220 | 88.96667*   | 1.21367 | .000  | 84.6689   | 93.2644   |
|        | 160914 | 84.29000*   | 1.21367 | .000  | 79.9923   | 88.5877   |
|        | 180321 | 105.83333*  | 1.21367 | .000  | 101.5356  | 110.1311  |
|        | 190330 | 47.52000*   | 1.21367 | .000  | 43.2223   | 51.8177   |
|        | 200422 | -301.22667* | 1.21367 | .000  | -305.5244 | -296.9289 |
|        | 200428 | 84.54667*   | 1.21367 | .000  | 80.2489   | 88.8444   |
|        | 200518 | 88.17000*   | 1.21367 | .000  | 83.8723   | 92.4677   |
|        | 200602 | 100.50333*  | 1.21367 | .000  | 96.2056   | 104.8011  |
| 180321 | 161212 | -22.08067*  | 1.21367 | .000  | -26.3784  | -17.7829  |
|        | 161220 | -16.86667*  | 1.21367 | .000  | -21.1644  | -12.5689  |
|        | 160914 | -21.54333*  | 1.21367 | .000  | -25.8411  | -17.2456  |
|        | 170911 | -105.83333* | 1.21367 | .000  | -110.1311 | -101.5356 |
|        | 190330 | -58.31333*  | 1.21367 | .000  | -62.6111  | -54.0156  |
|        | 200422 | -407.06000* | 1.21367 | .000  | -411.3577 | -402.7623 |
|        | 200428 | -21.28667*  | 1.21367 | .000  | -25.5844  | -16.9889  |
|        | 200518 | -17.66333*  | 1.21367 | .000  | -21.9611  | -13.3656  |
|        | 200602 | -5.33000*   | 1.21367 | .008  | -9.6277   | -1.0323   |
| 190330 | 161212 | 36.23267*   | 1.21367 | .000  | 31.9349   | 40.5304   |
|        | 161220 | 41.44667*   | 1.21367 | .000  | 37.1489   | 45.7444   |
|        | 160914 | 36.77000*   | 1.21367 | .000  | 32.4723   | 41.0677   |
|        | 170911 | -47.52000*  | 1.21367 | .000  | -51.8177  | -43.2223  |
|        | 180321 | 58.31333*   | 1.21367 | .000  | 54.0156   | 62.6111   |
|        | 200422 | -348.74667* | 1.21367 | .000  | -353.0444 | -344.4489 |
|        | 200428 | 37.02667*   | 1.21367 | .000  | 32.7289   | 41.3244   |
|        | 200518 | 40.65000*   | 1.21367 | .000  | 36.3523   | 44.9477   |
|        | 200602 | 52.98333*   | 1.21367 | .000  | 48.6856   | 57.2811   |
| 200422 | 161212 | 384.97933*  | 1.21367 | .000  | 380.6816  | 389.2771  |
|        | 161220 | 390.19333*  | 1.21367 | .000  | 385.8956  | 394.4911  |
|        | 160914 | 385.51667*  | 1.21367 | .000  | 381.2189  | 389.8144  |
|        | 170911 | 301.22667*  | 1.21367 | .000  | 296.9289  | 305.5244  |
|        | 180321 | 407.06000*  | 1.21367 | .000  | 402.7623  | 411.3577  |
|        | 190330 | 348.74667*  | 1.21367 | .000  | 344.4489  | 353.0444  |
|        | 200428 | 385.77333*  | 1.21367 | .000  | 381.4756  | 390.0711  |

|        |        |             |         |       |           |           |
|--------|--------|-------------|---------|-------|-----------|-----------|
|        | 200518 | 389.39667*  | 1.21367 | .000  | 385.0989  | 393.6944  |
|        | 200602 | 401.73000*  | 1.21367 | .000  | 397.4323  | 406.0277  |
| 200428 | 161212 | -.79400     | 1.21367 | 1.000 | -5.0917   | 3.5037    |
|        | 161220 | 4.42000*    | 1.21367 | .041  | .1223     | 8.7177    |
|        | 160914 | -.25667     | 1.21367 | 1.000 | -4.5544   | 4.0411    |
|        | 170911 | -84.54667*  | 1.21367 | .000  | -88.8444  | -80.2489  |
|        | 180321 | 21.28667*   | 1.21367 | .000  | 16.9889   | 25.5844   |
|        | 190330 | -37.02667*  | 1.21367 | .000  | -41.3244  | -32.7289  |
|        | 200422 | -385.77333* | 1.21367 | .000  | -390.0711 | -381.4756 |
|        | 200518 | 3.62333     | 1.21367 | .146  | -.6744    | 7.9211    |
|        | 200602 | 15.95667*   | 1.21367 | .000  | 11.6589   | 20.2544   |
| 200518 | 161212 | -4.41733*   | 1.21367 | .041  | -8.7151   | -.1196    |
|        | 161220 | .79667      | 1.21367 | 1.000 | -3.5011   | 5.0944    |
|        | 160914 | -3.88000    | 1.21367 | .098  | -8.1777   | .4177     |
|        | 170911 | -88.17000*  | 1.21367 | .000  | -92.4677  | -83.8723  |
|        | 180321 | 17.66333*   | 1.21367 | .000  | 13.3656   | 21.9611   |
|        | 190330 | -40.65000*  | 1.21367 | .000  | -44.9477  | -36.3523  |
|        | 200422 | -389.39667* | 1.21367 | .000  | -393.6944 | -385.0989 |
|        | 200428 | -3.62333    | 1.21367 | .146  | -7.9211   | .6744     |
|        | 200602 | 12.33333*   | 1.21367 | .000  | 8.0356    | 16.6311   |
| 200602 | 161212 | -16.75067*  | 1.21367 | .000  | -21.0484  | -12.4529  |
|        | 161220 | -11.53667*  | 1.21367 | .000  | -15.8344  | -7.2389   |
|        | 160914 | -16.21333*  | 1.21367 | .000  | -20.5111  | -11.9156  |
|        | 170911 | -100.50333* | 1.21367 | .000  | -104.8011 | -96.2056  |
|        | 180321 | 5.33000*    | 1.21367 | .008  | 1.0323    | 9.6277    |
|        | 190330 | -52.98333*  | 1.21367 | .000  | -57.2811  | -48.6856  |
|        | 200422 | -401.73000* | 1.21367 | .000  | -406.0277 | -397.4323 |
|        | 200428 | -15.95667*  | 1.21367 | .000  | -20.2544  | -11.6589  |
|        | 200518 | -12.33333*  | 1.21367 | .000  | -16.6311  | -8.0356   |

\*.The significance level of the difference between the averages is 0.05.

**Table.S8 The post hoc comparison results of(3S,19R)-3,14-dihydroangustoline,  $[\alpha]_D^{20}$ : (-) 294.7°, among ten batch *N.officinalis* herbs**

|                  | (I) Batch | (J) batch | Mean Difference (I-J) | Standard Error | Significance | 95% confidence interval |             |
|------------------|-----------|-----------|-----------------------|----------------|--------------|-------------------------|-------------|
|                  |           |           |                       |                |              | Lower limit             | Upper limit |
| <b>Tukey HSD</b> | 161212    | 161220    | 12.16733*             | 1.31293        | .000         | 7.5181                  | 16.8166     |
|                  |           | 160914    | 7.55400*              | 1.31293        | .000         | 2.9048                  | 12.2032     |
|                  |           | 170911    | -98.44600*            | 1.31293        | .000         | -103.0952               | -93.7968    |
|                  |           | 180321    | 38.51067*             | 1.31293        | .000         | 33.8614                 | 43.1599     |
|                  |           | 190330    | -50.18267*            | 1.31293        | .000         | -54.8319                | -45.5334    |
|                  |           | 200422    | -447.89600*           | 1.31293        | .000         | -452.5452               | -443.2468   |
|                  |           | 200428    | 6.86733*              | 1.31293        | .001         | 2.2181                  | 11.5166     |



|        |        |             |         |       |           |           |
|--------|--------|-------------|---------|-------|-----------|-----------|
|        | 200518 | 12.85733*   | 1.31293 | .000  | 8.2081    | 17.5066   |
|        | 200602 | 24.90733*   | 1.31293 | .000  | 20.2581   | 29.5566   |
| 161220 | 161212 | -12.16733*  | 1.31293 | .000  | -16.8166  | -7.5181   |
|        | 160914 | -4.61333    | 1.31293 | .053  | -9.2626   | .0359     |
|        | 170911 | -110.61333* | 1.31293 | .000  | -115.2626 | -105.9641 |
|        | 180321 | 26.34333*   | 1.31293 | .000  | 21.6941   | 30.9926   |
|        | 190330 | -62.35000*  | 1.31293 | .000  | -66.9992  | -57.7008  |
|        | 200422 | -460.06333* | 1.31293 | .000  | -464.7126 | -455.4141 |
|        | 200428 | -5.30000*   | 1.31293 | .018  | -9.9492   | -.6508    |
|        | 200518 | .69000      | 1.31293 | 1.000 | -3.9592   | 5.3392    |
|        | 200602 | 12.74000*   | 1.31293 | .000  | 8.0908    | 17.3892   |
| 160914 | 161212 | -7.55400*   | 1.31293 | .000  | -12.2032  | -2.9048   |
|        | 161220 | 4.61333     | 1.31293 | .053  | -.0359    | 9.2626    |
|        | 170911 | -106.00000* | 1.31293 | .000  | -110.6492 | -101.3508 |
|        | 180321 | 30.95667*   | 1.31293 | .000  | 26.3074   | 35.6059   |
|        | 190330 | -57.73667*  | 1.31293 | .000  | -62.3859  | -53.0874  |
|        | 200422 | -455.45000* | 1.31293 | .000  | -460.0992 | -450.8008 |
|        | 200428 | -.68667     | 1.31293 | 1.000 | -5.3359   | 3.9626    |
|        | 200518 | 5.30333*    | 1.31293 | .018  | .6541     | 9.9526    |
|        | 200602 | 17.35333*   | 1.31293 | .000  | 12.7041   | 22.0026   |
| 170911 | 161212 | 98.44600*   | 1.31293 | .000  | 93.7968   | 103.0952  |
|        | 161220 | 110.61333*  | 1.31293 | .000  | 105.9641  | 115.2626  |
|        | 160914 | 106.00000*  | 1.31293 | .000  | 101.3508  | 110.6492  |
|        | 180321 | 136.95667*  | 1.31293 | .000  | 132.3074  | 141.6059  |
|        | 190330 | 48.26333*   | 1.31293 | .000  | 43.6141   | 52.9126   |
|        | 200422 | -349.45000* | 1.31293 | .000  | -354.0992 | -344.8008 |
|        | 200428 | 105.31333*  | 1.31293 | .000  | 100.6641  | 109.9626  |
|        | 200518 | 111.30333*  | 1.31293 | .000  | 106.6541  | 115.9526  |
|        | 200602 | 123.35333*  | 1.31293 | .000  | 118.7041  | 128.0026  |
| 180321 | 161212 | -38.51067*  | 1.31293 | .000  | -43.1599  | -33.8614  |
|        | 161220 | -26.34333*  | 1.31293 | .000  | -30.9926  | -21.6941  |
|        | 160914 | -30.95667*  | 1.31293 | .000  | -35.6059  | -26.3074  |
|        | 170911 | -136.95667* | 1.31293 | .000  | -141.6059 | -132.3074 |
|        | 190330 | -88.69333*  | 1.31293 | .000  | -93.3426  | -84.0441  |
|        | 200422 | -486.40667* | 1.31293 | .000  | -491.0559 | -481.7574 |
|        | 200428 | -31.64333*  | 1.31293 | .000  | -36.2926  | -26.9941  |
|        | 200518 | -25.65333*  | 1.31293 | .000  | -30.3026  | -21.0041  |
|        | 200602 | -13.60333*  | 1.31293 | .000  | -18.2526  | -8.9541   |
| 190330 | 161212 | 50.18267*   | 1.31293 | .000  | 45.5334   | 54.8319   |
|        | 161220 | 62.35000*   | 1.31293 | .000  | 57.7008   | 66.9992   |
|        | 160914 | 57.73667*   | 1.31293 | .000  | 53.0874   | 62.3859   |
|        | 170911 | -48.26333*  | 1.31293 | .000  | -52.9126  | -43.6141  |
|        | 180321 | 88.69333*   | 1.31293 | .000  | 84.0441   | 93.3426   |

|        |        |             |         |       |           |           |
|--------|--------|-------------|---------|-------|-----------|-----------|
|        | 200422 | -397.71333* | 1.31293 | .000  | -402.3626 | -393.0641 |
|        | 200428 | 57.05000*   | 1.31293 | .000  | 52.4008   | 61.6992   |
|        | 200518 | 63.04000*   | 1.31293 | .000  | 58.3908   | 67.6892   |
|        | 200602 | 75.09000*   | 1.31293 | .000  | 70.4408   | 79.7392   |
| 200422 | 161212 | 447.89600*  | 1.31293 | .000  | 443.2468  | 452.5452  |
|        | 161220 | 460.06333*  | 1.31293 | .000  | 455.4141  | 464.7126  |
|        | 160914 | 455.45000*  | 1.31293 | .000  | 450.8008  | 460.0992  |
|        | 170911 | 349.45000*  | 1.31293 | .000  | 344.8008  | 354.0992  |
|        | 180321 | 486.40667*  | 1.31293 | .000  | 481.7574  | 491.0559  |
|        | 190330 | 397.71333*  | 1.31293 | .000  | 393.0641  | 402.3626  |
|        | 200428 | 454.76333*  | 1.31293 | .000  | 450.1141  | 459.4126  |
|        | 200518 | 460.75333*  | 1.31293 | .000  | 456.1041  | 465.4026  |
|        | 200602 | 472.80333*  | 1.31293 | .000  | 468.1541  | 477.4526  |
| 200428 | 161212 | -6.86733*   | 1.31293 | .001  | -11.5166  | -2.2181   |
|        | 161220 | 5.30000*    | 1.31293 | .018  | .6508     | 9.9492    |
|        | 160914 | .68667      | 1.31293 | 1.000 | -3.9626   | 5.3359    |
|        | 170911 | -105.31333* | 1.31293 | .000  | -109.9626 | -100.6641 |
|        | 180321 | 31.64333*   | 1.31293 | .000  | 26.9941   | 36.2926   |
|        | 190330 | -57.05000*  | 1.31293 | .000  | -61.6992  | -52.4008  |
|        | 200422 | -454.76333* | 1.31293 | .000  | -459.4126 | -450.1141 |
|        | 200518 | 5.99000*    | 1.31293 | .006  | 1.3408    | 10.6392   |
|        | 200602 | 18.04000*   | 1.31293 | .000  | 13.3908   | 22.6892   |
| 200518 | 161212 | -12.85733*  | 1.31293 | .000  | -17.5066  | -8.2081   |
|        | 161220 | -.69000     | 1.31293 | 1.000 | -5.3392   | 3.9592    |
|        | 160914 | -5.30333*   | 1.31293 | .018  | -9.9526   | -.6541    |
|        | 170911 | -111.30333* | 1.31293 | .000  | -115.9526 | -106.6541 |
|        | 180321 | 25.65333*   | 1.31293 | .000  | 21.0041   | 30.3026   |
|        | 190330 | -63.04000*  | 1.31293 | .000  | -67.6892  | -58.3908  |
|        | 200422 | -460.75333* | 1.31293 | .000  | -465.4026 | -456.1041 |
|        | 200428 | -5.99000*   | 1.31293 | .006  | -10.6392  | -1.3408   |
|        | 200602 | 12.05000*   | 1.31293 | .000  | 7.4008    | 16.6992   |
| 200602 | 161212 | -24.90733*  | 1.31293 | .000  | -29.5566  | -20.2581  |
|        | 161220 | -12.74000*  | 1.31293 | .000  | -17.3892  | -8.0908   |
|        | 160914 | -17.35333*  | 1.31293 | .000  | -22.0026  | -12.7041  |
|        | 170911 | -123.35333* | 1.31293 | .000  | -128.0026 | -118.7041 |
|        | 180321 | 13.60333*   | 1.31293 | .000  | 8.9541    | 18.2526   |
|        | 190330 | -75.09000*  | 1.31293 | .000  | -79.7392  | -70.4408  |
|        | 200422 | -472.80333* | 1.31293 | .000  | -477.4526 | -468.1541 |
|        | 200428 | -18.04000*  | 1.31293 | .000  | -22.6892  | -13.3908  |
|        | 200518 | -12.05000*  | 1.31293 | .000  | -16.6992  | -7.4008   |

\*.The significance level of the difference between the averages is 0.05.

**Table.S9 The post hoc comparison results of Strictosamide among ten batch *N.officinalis* herbs**

|                  | (I) Batch    | (J) batch    | Mean Difference<br>(I-J) | Standard<br>Error | Significance | 95% confidence interval<br>Lower limit Upper limit |           |
|------------------|--------------|--------------|--------------------------|-------------------|--------------|----------------------------------------------------|-----------|
| <b>Tukey HSD</b> | 161212       | 161220       | 230.10600*               | 12.93647          | .000         | 184.2965                                           | 275.9155  |
|                  |              | 160914       | 1052.99267*              | 12.93647          | .000         | 1007.1832                                          | 1098.8021 |
|                  |              | 170911       | 1254.93267*              | 12.93647          | .000         | 1209.1232                                          | 1300.7421 |
|                  |              | 180321       | 1147.57267*              | 12.93647          | .000         | 1101.7632                                          | 1193.3821 |
|                  |              | 190330       | 855.31933*               | 12.93647          | .000         | 809.5099                                           | 901.1288  |
|                  |              | 200422       | 159.45267*               | 12.93647          | .000         | 113.6432                                           | 205.2621  |
|                  |              | 200428       | 1481.18267*              | 12.93647          | .000         | 1435.3732                                          | 1526.9921 |
|                  |              | 200518       | 1483.78600*              | 12.93647          | .000         | 1437.9765                                          | 1529.5955 |
|                  | 200602       | -651.89400*  | 12.93647                 | .000              | -697.7035    | -606.0845                                          |           |
|                  | 161220       | 161212       | -230.10600*              | 12.93647          | .000         | -275.9155                                          | -184.2965 |
|                  |              | 160914       | 822.88667*               | 12.93647          | .000         | 777.0772                                           | 868.6961  |
|                  |              | 170911       | 1024.82667*              | 12.93647          | .000         | 979.0172                                           | 1070.6361 |
|                  |              | 180321       | 917.46667*               | 12.93647          | .000         | 871.6572                                           | 963.2761  |
|                  |              | 190330       | 625.21333*               | 12.93647          | .000         | 579.4039                                           | 671.0228  |
|                  |              | 200422       | -70.65333*               | 12.93647          | .001         | -116.4628                                          | -24.8439  |
|                  |              | 200428       | 1251.07667*              | 12.93647          | .000         | 1205.2672                                          | 1296.8861 |
| 200518           |              | 1253.68000*  | 12.93647                 | .000              | 1207.8705    | 1299.4895                                          |           |
| 200602           | -882.00000*  | 12.93647     | .000                     | -927.8095         | -836.1905    |                                                    |           |
| 160914           | 161212       | -1052.99267* | 12.93647                 | .000              | -1098.8021   | -1007.1832                                         |           |
|                  | 161220       | -822.88667*  | 12.93647                 | .000              | -868.6961    | -777.0772                                          |           |
|                  | 170911       | 201.94000*   | 12.93647                 | .000              | 156.1305     | 247.7495                                           |           |
|                  | 180321       | 94.58000*    | 12.93647                 | .000              | 48.7705      | 140.3895                                           |           |
|                  | 190330       | -197.67333*  | 12.93647                 | .000              | -243.4828    | -151.8639                                          |           |
|                  | 200422       | -893.54000*  | 12.93647                 | .000              | -939.3495    | -847.7305                                          |           |
|                  | 200428       | 428.19000*   | 12.93647                 | .000              | 382.3805     | 473.9995                                           |           |
|                  | 200518       | 430.79333*   | 12.93647                 | .000              | 384.9839     | 476.6028                                           |           |
| 200602           | -1704.88667* | 12.93647     | .000                     | -1750.6961        | -1659.0772   |                                                    |           |
| 170911           | 161212       | -1254.93267* | 12.93647                 | .000              | -1300.7421   | -1209.1232                                         |           |
|                  | 161220       | -1024.82667* | 12.93647                 | .000              | -1070.6361   | -979.0172                                          |           |
|                  | 160914       | -201.94000*  | 12.93647                 | .000              | -247.7495    | -156.1305                                          |           |
|                  | 180321       | -107.36000*  | 12.93647                 | .000              | -153.1695    | -61.5505                                           |           |
|                  | 190330       | -399.61333*  | 12.93647                 | .000              | -445.4228    | -353.8039                                          |           |
|                  | 200422       | -1095.48000* | 12.93647                 | .000              | -1141.2895   | -1049.6705                                         |           |
|                  | 200428       | 226.25000*   | 12.93647                 | .000              | 180.4405     | 272.0595                                           |           |
|                  | 200518       | 228.85333*   | 12.93647                 | .000              | 183.0439     | 274.6628                                           |           |
| 200602           | -1906.82667* | 12.93647     | .000                     | -1952.6361        | -1861.0172   |                                                    |           |
| 180321           | 161212       | -1147.57267* | 12.93647                 | .000              | -1193.3821   | -1101.7632                                         |           |
|                  | 161220       | -917.46667*  | 12.93647                 | .000              | -963.2761    | -871.6572                                          |           |
|                  | 160914       | -94.58000*   | 12.93647                 | .000              | -140.3895    | -48.7705                                           |           |
|                  | 170911       | 107.36000*   | 12.93647                 | .000              | 61.5505      | 153.1695                                           |           |

|        |        |              |          |       |            |            |
|--------|--------|--------------|----------|-------|------------|------------|
|        | 190330 | -292.25333*  | 12.93647 | .000  | -338.0628  | -246.4439  |
|        | 200422 | -988.12000*  | 12.93647 | .000  | -1033.9295 | -942.3105  |
|        | 200428 | 333.61000*   | 12.93647 | .000  | 287.8005   | 379.4195   |
|        | 200518 | 336.21333*   | 12.93647 | .000  | 290.4039   | 382.0228   |
|        | 200602 | -1799.46667* | 12.93647 | .000  | -1845.2761 | -1753.6572 |
| 190330 | 161212 | -855.31933*  | 12.93647 | .000  | -901.1288  | -809.5099  |
|        | 161220 | -625.21333*  | 12.93647 | .000  | -671.0228  | -579.4039  |
|        | 160914 | 197.67333*   | 12.93647 | .000  | 151.8639   | 243.4828   |
|        | 170911 | 399.61333*   | 12.93647 | .000  | 353.8039   | 445.4228   |
|        | 180321 | 292.25333*   | 12.93647 | .000  | 246.4439   | 338.0628   |
|        | 200422 | -695.86667*  | 12.93647 | .000  | -741.6761  | -650.0572  |
|        | 200428 | 625.86333*   | 12.93647 | .000  | 580.0539   | 671.6728   |
|        | 200518 | 628.46667*   | 12.93647 | .000  | 582.6572   | 674.2761   |
|        | 200602 | -1507.21333* | 12.93647 | .000  | -1553.0228 | -1461.4039 |
| 200422 | 161212 | -159.45267*  | 12.93647 | .000  | -205.2621  | -113.6432  |
|        | 161220 | 70.65333*    | 12.93647 | .001  | 24.8439    | 116.4628   |
|        | 160914 | 893.54000*   | 12.93647 | .000  | 847.7305   | 939.3495   |
|        | 170911 | 1095.48000*  | 12.93647 | .000  | 1049.6705  | 1141.2895  |
|        | 180321 | 988.12000*   | 12.93647 | .000  | 942.3105   | 1033.9295  |
|        | 190330 | 695.86667*   | 12.93647 | .000  | 650.0572   | 741.6761   |
|        | 200428 | 1321.73000*  | 12.93647 | .000  | 1275.9205  | 1367.5395  |
|        | 200518 | 1324.33333*  | 12.93647 | .000  | 1278.5239  | 1370.1428  |
|        | 200602 | -811.34667*  | 12.93647 | .000  | -857.1561  | -765.5372  |
| 200428 | 161212 | -1481.18267* | 12.93647 | .000  | -1526.9921 | -1435.3732 |
|        | 161220 | -1251.07667* | 12.93647 | .000  | -1296.8861 | -1205.2672 |
|        | 160914 | -428.19000*  | 12.93647 | .000  | -473.9995  | -382.3805  |
|        | 170911 | -226.25000*  | 12.93647 | .000  | -272.0595  | -180.4405  |
|        | 180321 | -333.61000*  | 12.93647 | .000  | -379.4195  | -287.8005  |
|        | 190330 | -625.86333*  | 12.93647 | .000  | -671.6728  | -580.0539  |
|        | 200422 | -1321.73000* | 12.93647 | .000  | -1367.5395 | -1275.9205 |
|        | 200518 | 2.60333      | 12.93647 | 1.000 | -43.2061   | 48.4128    |
|        | 200602 | -2133.07667* | 12.93647 | .000  | -2178.8861 | -2087.2672 |
| 200518 | 161212 | -1483.78600* | 12.93647 | .000  | -1529.5955 | -1437.9765 |
|        | 161220 | -1253.68000* | 12.93647 | .000  | -1299.4895 | -1207.8705 |
|        | 160914 | -430.79333*  | 12.93647 | .000  | -476.6028  | -384.9839  |
|        | 170911 | -228.85333*  | 12.93647 | .000  | -274.6628  | -183.0439  |
|        | 180321 | -336.21333*  | 12.93647 | .000  | -382.0228  | -290.4039  |
|        | 190330 | -628.46667*  | 12.93647 | .000  | -674.2761  | -582.6572  |
|        | 200422 | -1324.33333* | 12.93647 | .000  | -1370.1428 | -1278.5239 |
|        | 200428 | -2.60333     | 12.93647 | 1.000 | -48.4128   | 43.2061    |
|        | 200602 | -2135.68000* | 12.93647 | .000  | -2181.4895 | -2089.8705 |
| 200602 | 161212 | 651.89400*   | 12.93647 | .000  | 606.0845   | 697.7035   |
|        | 161220 | 882.00000*   | 12.93647 | .000  | 836.1905   | 927.8095   |

|        |             |          |      |           |           |
|--------|-------------|----------|------|-----------|-----------|
| 160914 | 1704.88667* | 12.93647 | .000 | 1659.0772 | 1750.6961 |
| 170911 | 1906.82667* | 12.93647 | .000 | 1861.0172 | 1952.6361 |
| 180321 | 1799.46667* | 12.93647 | .000 | 1753.6572 | 1845.2761 |
| 190330 | 1507.21333* | 12.93647 | .000 | 1461.4039 | 1553.0228 |
| 200422 | 811.34667*  | 12.93647 | .000 | 765.5372  | 857.1561  |
| 200428 | 2133.07667* | 12.93647 | .000 | 2087.2672 | 2178.8861 |
| 200518 | 2135.68000* | 12.93647 | .000 | 2089.8705 | 2181.4895 |

\*.The significance level of the difference between the averages is 0.05.

**Table.S10 The post hoc comparison results of Angustine among ten batch *N.officinalis* herbs**

|                  | (I) Batch   | (J) batch | Mean Difference<br>(I-J) | Standard<br>Error | Significanc<br>e | 95% confidence interval<br>Lower limit Upper limit |           |
|------------------|-------------|-----------|--------------------------|-------------------|------------------|----------------------------------------------------|-----------|
| <b>Tukey HSD</b> | 161212      | 161220    | 1.07933*                 | .29441            | .039             | .0368                                              | 2.1219    |
|                  |             | 160914    | .32600                   | .29441            | .978             | -.7166                                             | 1.3686    |
|                  |             | 170911    | -24.03067*               | .29441            | .000             | -25.0732                                           | -22.9881  |
|                  |             | 180321    | 4.56933*                 | .29441            | .000             | 3.5268                                             | 5.6119    |
|                  |             | 190330    | -30.25067*               | .29441            | .000             | -31.2932                                           | -29.2081  |
|                  |             | 200422    | -179.32400*              | .29441            | .000             | -180.3666                                          | -178.2814 |
|                  |             | 200428    | .82600                   | .29441            | .200             | -.2166                                             | 1.8686    |
|                  |             | 200518    | 5.87600*                 | .29441            | .000             | 4.8334                                             | 6.9186    |
|                  |             | 200602    | 8.85600*                 | .29441            | .000             | 7.8134                                             | 9.8986    |
|                  |             |           | 161220                   | 161212            | -1.07933*        | .29441                                             | .039      |
| 160914           | -.75333     |           |                          | .29441            | .297             | -1.7959                                            | .2892     |
| 170911           | -25.11000*  |           |                          | .29441            | .000             | -26.1526                                           | -24.0674  |
| 180321           | 3.49000*    |           |                          | .29441            | .000             | 2.4474                                             | 4.5326    |
| 190330           | -31.33000*  |           |                          | .29441            | .000             | -32.3726                                           | -30.2874  |
| 200422           | -180.40333* |           |                          | .29441            | .000             | -181.4459                                          | -179.3608 |
| 200428           | -.25333     |           |                          | .29441            | .996             | -1.2959                                            | .7892     |
| 200518           | 4.79667*    |           |                          | .29441            | .000             | 3.7541                                             | 5.8392    |
| 200602           | 7.77667*    |           |                          | .29441            | .000             | 6.7341                                             | 8.8192    |
|                  | 160914      |           |                          | 161212            | -.32600          | .29441                                             | .978      |
|                  |             | 161220    | .75333                   | .29441            | .297             | -.2892                                             | 1.7959    |
|                  |             | 170911    | -24.35667*               | .29441            | .000             | -25.3992                                           | -23.3141  |
|                  |             | 180321    | 4.24333*                 | .29441            | .000             | 3.2008                                             | 5.2859    |
|                  |             | 190330    | -30.57667*               | .29441            | .000             | -31.6192                                           | -29.5341  |
|                  |             | 200422    | -179.65000*              | .29441            | .000             | -180.6926                                          | -178.6074 |
|                  |             | 200428    | .50000                   | .29441            | .784             | -.5426                                             | 1.5426    |
|                  |             | 200518    | 5.55000*                 | .29441            | .000             | 4.5074                                             | 6.5926    |
|                  |             | 200602    | 8.53000*                 | .29441            | .000             | 7.4874                                             | 9.5726    |
|                  |             |           | 170911                   | 161212            | 24.03067*        | .29441                                             | .000      |

|        |        |             |        |      |           |           |
|--------|--------|-------------|--------|------|-----------|-----------|
|        | 161220 | 25.11000*   | .29441 | .000 | 24.0674   | 26.1526   |
|        | 160914 | 24.35667*   | .29441 | .000 | 23.3141   | 25.3992   |
|        | 180321 | 28.60000*   | .29441 | .000 | 27.5574   | 29.6426   |
|        | 190330 | -6.22000*   | .29441 | .000 | -7.2626   | -5.1774   |
|        | 200422 | -155.29333* | .29441 | .000 | -156.3359 | -154.2508 |
|        | 200428 | 24.85667*   | .29441 | .000 | 23.8141   | 25.8992   |
|        | 200518 | 29.90667*   | .29441 | .000 | 28.8641   | 30.9492   |
|        | 200602 | 32.88667*   | .29441 | .000 | 31.8441   | 33.9292   |
| 180321 | 161212 | -4.56933*   | .29441 | .000 | -5.6119   | -3.5268   |
|        | 161220 | -3.49000*   | .29441 | .000 | -4.5326   | -2.4474   |
|        | 160914 | -4.24333*   | .29441 | .000 | -5.2859   | -3.2008   |
|        | 170911 | -28.60000*  | .29441 | .000 | -29.6426  | -27.5574  |
|        | 190330 | -34.82000*  | .29441 | .000 | -35.8626  | -33.7774  |
|        | 200422 | -183.89333* | .29441 | .000 | -184.9359 | -182.8508 |
|        | 200428 | -3.74333*   | .29441 | .000 | -4.7859   | -2.7008   |
|        | 200518 | 1.30667*    | .29441 | .007 | .2641     | 2.3492    |
|        | 200602 | 4.28667*    | .29441 | .000 | 3.2441    | 5.3292    |
| 190330 | 161212 | 30.25067*   | .29441 | .000 | 29.2081   | 31.2932   |
|        | 161220 | 31.33000*   | .29441 | .000 | 30.2874   | 32.3726   |
|        | 160914 | 30.57667*   | .29441 | .000 | 29.5341   | 31.6192   |
|        | 170911 | 6.22000*    | .29441 | .000 | 5.1774    | 7.2626    |
|        | 180321 | 34.82000*   | .29441 | .000 | 33.7774   | 35.8626   |
|        | 200422 | -149.07333* | .29441 | .000 | -150.1159 | -148.0308 |
|        | 200428 | 31.07667*   | .29441 | .000 | 30.0341   | 32.1192   |
|        | 200518 | 36.12667*   | .29441 | .000 | 35.0841   | 37.1692   |
|        | 200602 | 39.10667*   | .29441 | .000 | 38.0641   | 40.1492   |
| 200422 | 161212 | 179.32400*  | .29441 | .000 | 178.2814  | 180.3666  |
|        | 161220 | 180.40333*  | .29441 | .000 | 179.3608  | 181.4459  |
|        | 160914 | 179.65000*  | .29441 | .000 | 178.6074  | 180.6926  |
|        | 170911 | 155.29333*  | .29441 | .000 | 154.2508  | 156.3359  |
|        | 180321 | 183.89333*  | .29441 | .000 | 182.8508  | 184.9359  |
|        | 190330 | 149.07333*  | .29441 | .000 | 148.0308  | 150.1159  |
|        | 200428 | 180.15000*  | .29441 | .000 | 179.1074  | 181.1926  |
|        | 200518 | 185.20000*  | .29441 | .000 | 184.1574  | 186.2426  |
|        | 200602 | 188.18000*  | .29441 | .000 | 187.1374  | 189.2226  |
| 200428 | 161212 | -.82600     | .29441 | .200 | -1.8686   | .2166     |
|        | 161220 | .25333      | .29441 | .996 | -.7892    | 1.2959    |
|        | 160914 | -.50000     | .29441 | .784 | -1.5426   | .5426     |
|        | 170911 | -24.85667*  | .29441 | .000 | -25.8992  | -23.8141  |
|        | 180321 | 3.74333*    | .29441 | .000 | 2.7008    | 4.7859    |

|        |        |             |        |      |           |           |
|--------|--------|-------------|--------|------|-----------|-----------|
|        | 190330 | -31.07667*  | .29441 | .000 | -32.1192  | -30.0341  |
|        | 200422 | -180.15000* | .29441 | .000 | -181.1926 | -179.1074 |
|        | 200518 | 5.05000*    | .29441 | .000 | 4.0074    | 6.0926    |
|        | 200602 | 8.03000*    | .29441 | .000 | 6.9874    | 9.0726    |
| 200518 | 161212 | -5.87600*   | .29441 | .000 | -6.9186   | -4.8334   |
|        | 161220 | -4.79667*   | .29441 | .000 | -5.8392   | -3.7541   |
|        | 160914 | -5.55000*   | .29441 | .000 | -6.5926   | -4.5074   |
|        | 170911 | -29.90667*  | .29441 | .000 | -30.9492  | -28.8641  |
|        | 180321 | -1.30667*   | .29441 | .007 | -2.3492   | -.2641    |
|        | 190330 | -36.12667*  | .29441 | .000 | -37.1692  | -35.0841  |
|        | 200422 | -185.20000* | .29441 | .000 | -186.2426 | -184.1574 |
|        | 200428 | -5.05000*   | .29441 | .000 | -6.0926   | -4.0074   |
|        | 200602 | 2.98000*    | .29441 | .000 | 1.9374    | 4.0226    |
| 200602 | 161212 | -8.85600*   | .29441 | .000 | -9.8986   | -7.8134   |
|        | 161220 | -7.77667*   | .29441 | .000 | -8.8192   | -6.7341   |
|        | 160914 | -8.53000*   | .29441 | .000 | -9.5726   | -7.4874   |
|        | 170911 | -32.88667*  | .29441 | .000 | -33.9292  | -31.8441  |
|        | 180321 | -4.28667*   | .29441 | .000 | -5.3292   | -3.2441   |
|        | 190330 | -39.10667*  | .29441 | .000 | -40.1492  | -38.0641  |
|        | 200422 | -188.18000* | .29441 | .000 | -189.2226 | -187.1374 |
|        | 200428 | -8.03000*   | .29441 | .000 | -9.0726   | -6.9874   |
|        | 200518 | -2.98000*   | .29441 | .000 | -4.0226   | -1.9374   |

**Table.S11 The post hoc comparison results of Vincosamide among ten batch *N.officinalis* herbs**

|                  | (I) Batch  | (J) batch | Mean Difference<br>(I-J) | Standard<br>Error | Significance | 95% confidence interval |             |
|------------------|------------|-----------|--------------------------|-------------------|--------------|-------------------------|-------------|
|                  |            |           |                          |                   |              | Lower limit             | Upper limit |
| <b>Tukey HSD</b> | 161212     | 161220    | -3.64167*                | .46498            | .000         | -5.2882                 | -1.9951     |
|                  |            | 160914    | -48.54500*               | .46498            | .000         | -50.1915                | -46.8985    |
|                  |            | 170911    | -21.23500*               | .46498            | .000         | -22.8815                | -19.5885    |
|                  |            | 180321    | -40.60833*               | .46498            | .000         | -42.2549                | -38.9618    |
|                  |            | 190330    | -48.76500*               | .46498            | .000         | -50.4115                | -47.1185    |
|                  |            | 200422    | -29.46833*               | .46498            | .000         | -31.1149                | -27.8218    |
|                  |            | 200428    | -50.62500*               | .46498            | .000         | -52.2715                | -48.9785    |
|                  |            | 200518    | -52.39500*               | .46498            | .000         | -54.0415                | -50.7485    |
|                  |            | 200602    | -55.66833*               | .46498            | .000         | -57.3149                | -54.0218    |
|                  |            | 161220    | 161212                   | 161212            | 3.64167*     | .46498                  | .000        |
| 160914           | -44.90333* |           |                          | .46498            | .000         | -46.5499                | -43.2568    |
| 170911           | -17.59333* |           |                          | .46498            | .000         | -19.2399                | -15.9468    |
| 180321           | -36.96667* |           |                          | .46498            | .000         | -38.6132                | -35.3201    |
| 190330           | -45.12333* |           |                          | .46498            | .000         | -46.7699                | -43.4768    |
| 200422           | -25.82667* |           |                          | .46498            | .000         | -27.4732                | -24.1801    |

|        |        |            |        |       |          |          |
|--------|--------|------------|--------|-------|----------|----------|
|        | 200428 | -46.98333* | .46498 | .000  | -48.6299 | -45.3368 |
|        | 200518 | -48.75333* | .46498 | .000  | -50.3999 | -47.1068 |
|        | 200602 | -52.02667* | .46498 | .000  | -53.6732 | -50.3801 |
| 160914 | 161212 | 48.54500*  | .46498 | .000  | 46.8985  | 50.1915  |
|        | 161220 | 44.90333*  | .46498 | .000  | 43.2568  | 46.5499  |
|        | 170911 | 27.31000*  | .46498 | .000  | 25.6635  | 28.9565  |
|        | 180321 | 7.93667*   | .46498 | .000  | 6.2901   | 9.5832   |
|        | 190330 | -.22000    | .46498 | 1.000 | -1.8665  | 1.4265   |
|        | 200422 | 19.07667*  | .46498 | .000  | 17.4301  | 20.7232  |
|        | 200428 | -2.08000*  | .46498 | .007  | -3.7265  | -.4335   |
|        | 200518 | -3.85000*  | .46498 | .000  | -5.4965  | -2.2035  |
|        | 200602 | -7.12333*  | .46498 | .000  | -8.7699  | -5.4768  |
| 170911 | 161212 | 21.23500*  | .46498 | .000  | 19.5885  | 22.8815  |
|        | 161220 | 17.59333*  | .46498 | .000  | 15.9468  | 19.2399  |
|        | 160914 | -27.31000* | .46498 | .000  | -28.9565 | -25.6635 |
|        | 180321 | -19.37333* | .46498 | .000  | -21.0199 | -17.7268 |
|        | 190330 | -27.53000* | .46498 | .000  | -29.1765 | -25.8835 |
|        | 200422 | -8.23333*  | .46498 | .000  | -9.8799  | -6.5868  |
|        | 200428 | -29.39000* | .46498 | .000  | -31.0365 | -27.7435 |
|        | 200518 | -31.16000* | .46498 | .000  | -32.8065 | -29.5135 |
|        | 200602 | -34.43333* | .46498 | .000  | -36.0799 | -32.7868 |
| 180321 | 161212 | 40.60833*  | .46498 | .000  | 38.9618  | 42.2549  |
|        | 161220 | 36.96667*  | .46498 | .000  | 35.3201  | 38.6132  |
|        | 160914 | -7.93667*  | .46498 | .000  | -9.5832  | -6.2901  |
|        | 170911 | 19.37333*  | .46498 | .000  | 17.7268  | 21.0199  |
|        | 190330 | -8.15667*  | .46498 | .000  | -9.8032  | -6.5101  |
|        | 200422 | 11.14000*  | .46498 | .000  | 9.4935   | 12.7865  |
|        | 200428 | -10.01667* | .46498 | .000  | -11.6632 | -8.3701  |
|        | 200518 | -11.78667* | .46498 | .000  | -13.4332 | -10.1401 |
|        | 200602 | -15.06000* | .46498 | .000  | -16.7065 | -13.4135 |
| 190330 | 161212 | 48.76500*  | .46498 | .000  | 47.1185  | 50.4115  |
|        | 161220 | 45.12333*  | .46498 | .000  | 43.4768  | 46.7699  |
|        | 160914 | .22000     | .46498 | 1.000 | -1.4265  | 1.8665   |
|        | 170911 | 27.53000*  | .46498 | .000  | 25.8835  | 29.1765  |
|        | 180321 | 8.15667*   | .46498 | .000  | 6.5101   | 9.8032   |
|        | 200422 | 19.29667*  | .46498 | .000  | 17.6501  | 20.9432  |
|        | 200428 | -1.86000*  | .46498 | .019  | -3.5065  | -.2135   |
|        | 200518 | -3.63000*  | .46498 | .000  | -5.2765  | -1.9835  |
|        | 200602 | -6.90333*  | .46498 | .000  | -8.5499  | -5.2568  |
| 200422 | 161212 | 29.46833*  | .46498 | .000  | 27.8218  | 31.1149  |
|        | 161220 | 25.82667*  | .46498 | .000  | 24.1801  | 27.4732  |
|        | 160914 | -19.07667* | .46498 | .000  | -20.7232 | -17.4301 |
|        | 170911 | 8.23333*   | .46498 | .000  | 6.5868   | 9.8799   |



|        |        |            |        |      |          |          |
|--------|--------|------------|--------|------|----------|----------|
|        | 180321 | -11.14000* | .46498 | .000 | -12.7865 | -9.4935  |
|        | 190330 | -19.29667* | .46498 | .000 | -20.9432 | -17.6501 |
|        | 200428 | -21.15667* | .46498 | .000 | -22.8032 | -19.5101 |
|        | 200518 | -22.92667* | .46498 | .000 | -24.5732 | -21.2801 |
|        | 200602 | -26.20000* | .46498 | .000 | -27.8465 | -24.5535 |
| 200428 | 161212 | 50.62500*  | .46498 | .000 | 48.9785  | 52.2715  |
|        | 161220 | 46.98333*  | .46498 | .000 | 45.3368  | 48.6299  |
|        | 160914 | 2.08000*   | .46498 | .007 | .4335    | 3.7265   |
|        | 170911 | 29.39000*  | .46498 | .000 | 27.7435  | 31.0365  |
|        | 180321 | 10.01667*  | .46498 | .000 | 8.3701   | 11.6632  |
|        | 190330 | 1.86000*   | .46498 | .019 | .2135    | 3.5065   |
|        | 200422 | 21.15667*  | .46498 | .000 | 19.5101  | 22.8032  |
|        | 200518 | -1.77000*  | .46498 | .029 | -3.4165  | -.1235   |
|        | 200602 | -5.04333*  | .46498 | .000 | -6.6899  | -3.3968  |
| 200518 | 161212 | 52.39500*  | .46498 | .000 | 50.7485  | 54.0415  |
|        | 161220 | 48.75333*  | .46498 | .000 | 47.1068  | 50.3999  |
|        | 160914 | 3.85000*   | .46498 | .000 | 2.2035   | 5.4965   |
|        | 170911 | 31.16000*  | .46498 | .000 | 29.5135  | 32.8065  |
|        | 180321 | 11.78667*  | .46498 | .000 | 10.1401  | 13.4332  |
|        | 190330 | 3.63000*   | .46498 | .000 | 1.9835   | 5.2765   |
|        | 200422 | 22.92667*  | .46498 | .000 | 21.2801  | 24.5732  |
|        | 200428 | 1.77000*   | .46498 | .029 | .1235    | 3.4165   |
|        | 200602 | -3.27333*  | .46498 | .000 | -4.9199  | -1.6268  |
| 200602 | 161212 | 55.66833*  | .46498 | .000 | 54.0218  | 57.3149  |
|        | 161220 | 52.02667*  | .46498 | .000 | 50.3801  | 53.6732  |
|        | 160914 | 7.12333*   | .46498 | .000 | 5.4768   | 8.7699   |
|        | 170911 | 34.43333*  | .46498 | .000 | 32.7868  | 36.0799  |
|        | 180321 | 15.06000*  | .46498 | .000 | 13.4135  | 16.7065  |
|        | 190330 | 6.90333*   | .46498 | .000 | 5.2568   | 8.5499   |
|        | 200422 | 26.20000*  | .46498 | .000 | 24.5535  | 27.8465  |
|        | 200428 | 5.04333*   | .46498 | .000 | 3.3968   | 6.6899   |
|        | 200518 | 3.27333*   | .46498 | .000 | 1.6268   | 4.9199   |

\*.The significance level of the difference between the averages is 0.05.

**Table.S12 The post hoc comparison results of 3,14-Dihydroangustine among ten batch *N.officinalis* herbs**

|                  | (I) Batch | (J) batch | Mean Difference<br>(I-J) | Standard<br>Error | Significance | 95% confidence interval |             |
|------------------|-----------|-----------|--------------------------|-------------------|--------------|-------------------------|-------------|
|                  |           |           |                          |                   |              | Lower limit             | Upper limit |
| <b>Tukey HSD</b> | 161212    | 161220    | 10.78633*                | .54775            | .000         | 8.8467                  | 12.7260     |
|                  |           | 160914    | 11.37967*                | .54775            | .000         | 9.4400                  | 13.3193     |
|                  |           | 170911    | -37.41700*               | .54775            | .000         | -39.3566                | -35.4774    |
|                  |           | 180321    | 50.70633*                | .54775            | .000         | 48.7667                 | 52.6460     |
|                  |           | 190330    | -53.55367*               | .54775            | .000         | -55.4933                | -51.6140    |

|        |        |             |        |      |           |           |
|--------|--------|-------------|--------|------|-----------|-----------|
|        | 200422 | -249.51367* | .54775 | .000 | -251.4533 | -247.5740 |
|        | 200428 | 25.63300*   | .54775 | .000 | 23.6934   | 27.5726   |
|        | 200518 | 36.32300*   | .54775 | .000 | 34.3834   | 38.2626   |
|        | 200602 | 41.15633*   | .54775 | .000 | 39.2167   | 43.0960   |
| 161220 | 161212 | -10.78633*  | .54775 | .000 | -12.7260  | -8.8467   |
|        | 160914 | .59333      | .54775 | .981 | -1.3463   | 2.5330    |
|        | 170911 | -48.20333*  | .54775 | .000 | -50.1430  | -46.2637  |
|        | 180321 | 39.92000*   | .54775 | .000 | 37.9804   | 41.8596   |
|        | 190330 | -64.34000*  | .54775 | .000 | -66.2796  | -62.4004  |
|        | 200422 | -260.30000* | .54775 | .000 | -262.2396 | -258.3604 |
|        | 200428 | 14.84667*   | .54775 | .000 | 12.9070   | 16.7863   |
|        | 200518 | 25.53667*   | .54775 | .000 | 23.5970   | 27.4763   |
|        | 200602 | 30.37000*   | .54775 | .000 | 28.4304   | 32.3096   |
| 160914 | 161212 | -11.37967*  | .54775 | .000 | -13.3193  | -9.4400   |
|        | 161220 | -.59333     | .54775 | .981 | -2.5330   | 1.3463    |
|        | 170911 | -48.79667*  | .54775 | .000 | -50.7363  | -46.8570  |
|        | 180321 | 39.32667*   | .54775 | .000 | 37.3870   | 41.2663   |
|        | 190330 | -64.93333*  | .54775 | .000 | -66.8730  | -62.9937  |
|        | 200422 | -260.89333* | .54775 | .000 | -262.8330 | -258.9537 |
|        | 200428 | 14.25333*   | .54775 | .000 | 12.3137   | 16.1930   |
|        | 200518 | 24.94333*   | .54775 | .000 | 23.0037   | 26.8830   |
|        | 200602 | 29.77667*   | .54775 | .000 | 27.8370   | 31.7163   |
| 170911 | 161212 | 37.41700*   | .54775 | .000 | 35.4774   | 39.3566   |
|        | 161220 | 48.20333*   | .54775 | .000 | 46.2637   | 50.1430   |
|        | 160914 | 48.79667*   | .54775 | .000 | 46.8570   | 50.7363   |
|        | 180321 | 88.12333*   | .54775 | .000 | 86.1837   | 90.0630   |
|        | 190330 | -16.13667*  | .54775 | .000 | -18.0763  | -14.1970  |
|        | 200422 | -212.09667* | .54775 | .000 | -214.0363 | -210.1570 |
|        | 200428 | 63.05000*   | .54775 | .000 | 61.1104   | 64.9896   |
|        | 200518 | 73.74000*   | .54775 | .000 | 71.8004   | 75.6796   |
|        | 200602 | 78.57333*   | .54775 | .000 | 76.6337   | 80.5130   |
| 180321 | 161212 | -50.70633*  | .54775 | .000 | -52.6460  | -48.7667  |
|        | 161220 | -39.92000*  | .54775 | .000 | -41.8596  | -37.9804  |
|        | 160914 | -39.32667*  | .54775 | .000 | -41.2663  | -37.3870  |
|        | 170911 | -88.12333*  | .54775 | .000 | -90.0630  | -86.1837  |
|        | 190330 | -104.26000* | .54775 | .000 | -106.1996 | -102.3204 |
|        | 200422 | -300.22000* | .54775 | .000 | -302.1596 | -298.2804 |
|        | 200428 | -25.07333*  | .54775 | .000 | -27.0130  | -23.1337  |
|        | 200518 | -14.38333*  | .54775 | .000 | -16.3230  | -12.4437  |
|        | 200602 | -9.55000*   | .54775 | .000 | -11.4896  | -7.6104   |
| 190330 | 161212 | 53.55367*   | .54775 | .000 | 51.6140   | 55.4933   |
|        | 161220 | 64.34000*   | .54775 | .000 | 62.4004   | 66.2796   |
|        | 160914 | 64.93333*   | .54775 | .000 | 62.9937   | 66.8730   |

|        |        |             |        |      |           |           |
|--------|--------|-------------|--------|------|-----------|-----------|
|        | 170911 | 16.13667*   | .54775 | .000 | 14.1970   | 18.0763   |
|        | 180321 | 104.26000*  | .54775 | .000 | 102.3204  | 106.1996  |
|        | 200422 | -195.96000* | .54775 | .000 | -197.8996 | -194.0204 |
|        | 200428 | 79.18667*   | .54775 | .000 | 77.2470   | 81.1263   |
|        | 200518 | 89.87667*   | .54775 | .000 | 87.9370   | 91.8163   |
|        | 200602 | 94.71000*   | .54775 | .000 | 92.7704   | 96.6496   |
| 200422 | 161212 | 249.51367*  | .54775 | .000 | 247.5740  | 251.4533  |
|        | 161220 | 260.30000*  | .54775 | .000 | 258.3604  | 262.2396  |
|        | 160914 | 260.89333*  | .54775 | .000 | 258.9537  | 262.8330  |
|        | 170911 | 212.09667*  | .54775 | .000 | 210.1570  | 214.0363  |
|        | 180321 | 300.22000*  | .54775 | .000 | 298.2804  | 302.1596  |
|        | 190330 | 195.96000*  | .54775 | .000 | 194.0204  | 197.8996  |
|        | 200428 | 275.14667*  | .54775 | .000 | 273.2070  | 277.0863  |
|        | 200518 | 285.83667*  | .54775 | .000 | 283.8970  | 287.7763  |
|        | 200602 | 290.67000*  | .54775 | .000 | 288.7304  | 292.6096  |
| 200428 | 161212 | -25.63300*  | .54775 | .000 | -27.5726  | -23.6934  |
|        | 161220 | -14.84667*  | .54775 | .000 | -16.7863  | -12.9070  |
|        | 160914 | -14.25333*  | .54775 | .000 | -16.1930  | -12.3137  |
|        | 170911 | -63.05000*  | .54775 | .000 | -64.9896  | -61.1104  |
|        | 180321 | 25.07333*   | .54775 | .000 | 23.1337   | 27.0130   |
|        | 190330 | -79.18667*  | .54775 | .000 | -81.1263  | -77.2470  |
|        | 200422 | -275.14667* | .54775 | .000 | -277.0863 | -273.2070 |
|        | 200518 | 10.69000*   | .54775 | .000 | 8.7504    | 12.6296   |
|        | 200602 | 15.52333*   | .54775 | .000 | 13.5837   | 17.4630   |
| 200518 | 161212 | -36.32300*  | .54775 | .000 | -38.2626  | -34.3834  |
|        | 161220 | -25.53667*  | .54775 | .000 | -27.4763  | -23.5970  |
|        | 160914 | -24.94333*  | .54775 | .000 | -26.8830  | -23.0037  |
|        | 170911 | -73.74000*  | .54775 | .000 | -75.6796  | -71.8004  |
|        | 180321 | 14.38333*   | .54775 | .000 | 12.4437   | 16.3230   |
|        | 190330 | -89.87667*  | .54775 | .000 | -91.8163  | -87.9370  |
|        | 200422 | -285.83667* | .54775 | .000 | -287.7763 | -283.8970 |
|        | 200428 | -10.69000*  | .54775 | .000 | -12.6296  | -8.7504   |
|        | 200602 | 4.83333*    | .54775 | .000 | 2.8937    | 6.7730    |
| 200602 | 161212 | -41.15633*  | .54775 | .000 | -43.0960  | -39.2167  |
|        | 161220 | -30.37000*  | .54775 | .000 | -32.3096  | -28.4304  |
|        | 160914 | -29.77667*  | .54775 | .000 | -31.7163  | -27.8370  |
|        | 170911 | -78.57333*  | .54775 | .000 | -80.5130  | -76.6337  |
|        | 180321 | 9.55000*    | .54775 | .000 | 7.6104    | 11.4896   |
|        | 190330 | -94.71000*  | .54775 | .000 | -96.6496  | -92.7704  |
|        | 200422 | -290.67000* | .54775 | .000 | -292.6096 | -288.7304 |
|        | 200428 | -15.52333*  | .54775 | .000 | -17.4630  | -13.5837  |
|        | 200518 | -4.83333*   | .54775 | .000 | -6.7730   | -2.8937   |

\*. The significance level of the difference between the averages is 0.05.
